# Supplementary material for: Productivity in an Organizational Setting: A Systematic View of the Causalities at Work
Source: MDPI journal article supplement (doi:10.3390/admsci12030090), 2022-07-25
Supplement: s1 [file s1]

# Productivity in an Organizational Setting: -A Systematic View of the Causalities at Work-SUPPLEMENTAL

1.1. De Meulenaere et al. (2016)

1.1.1. Causal relationships from the literature

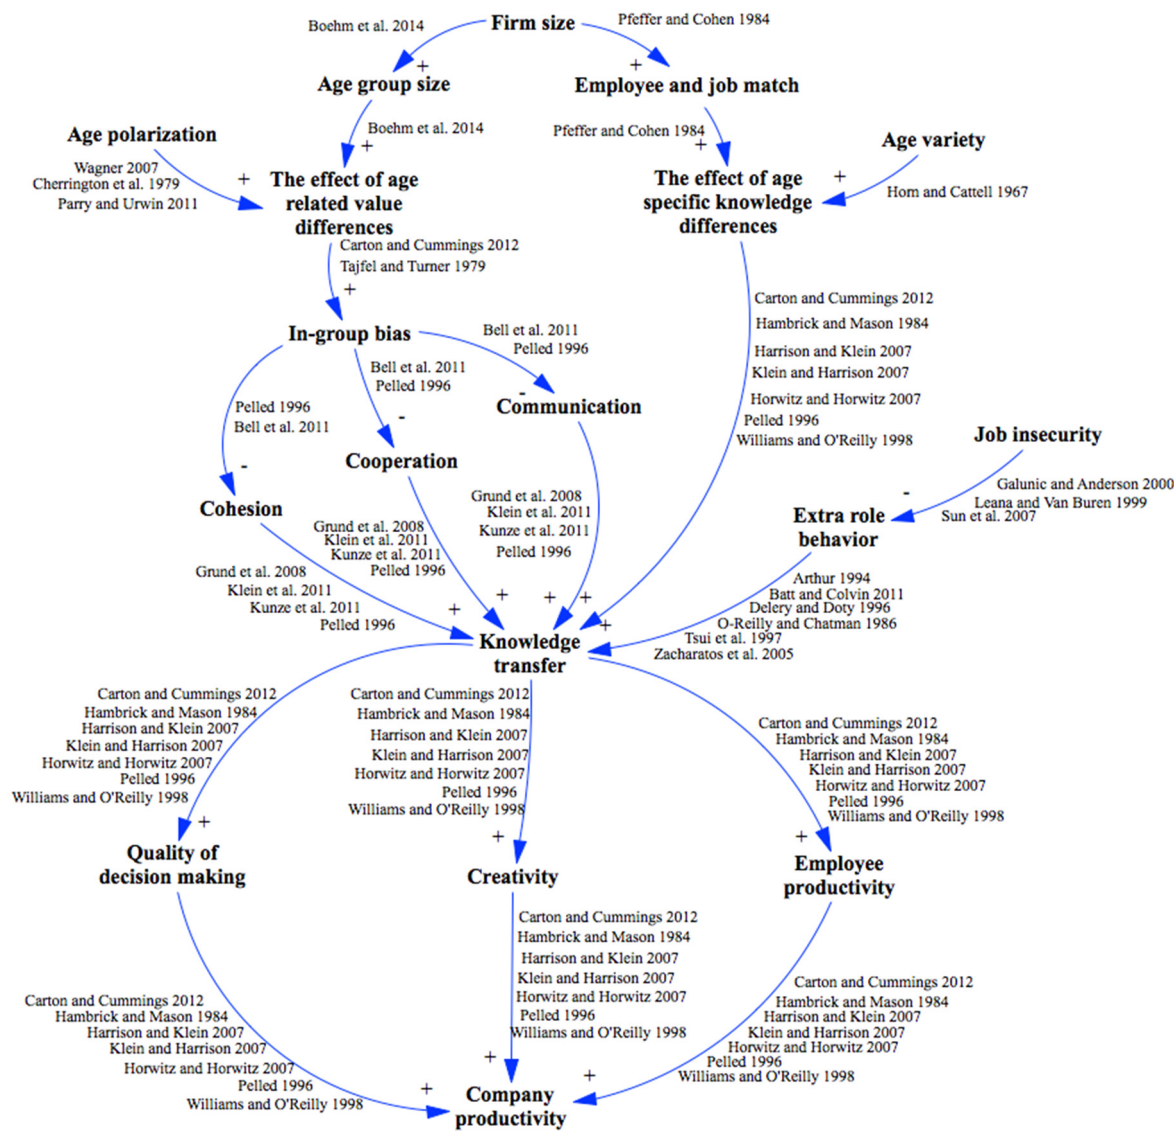

Figure 4. Causal relationships from the literature of De Meulanere et al. (2015).



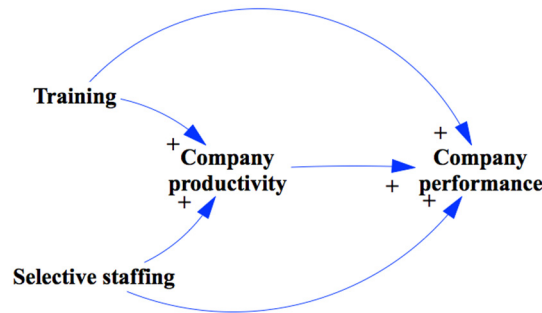

Figure 7. Causal relationships from the results of Kim and Ployhart (2014).

### 1.3. Delmas and Pekovic (2012)

#### 1.3.1. Causal relationships from the literature

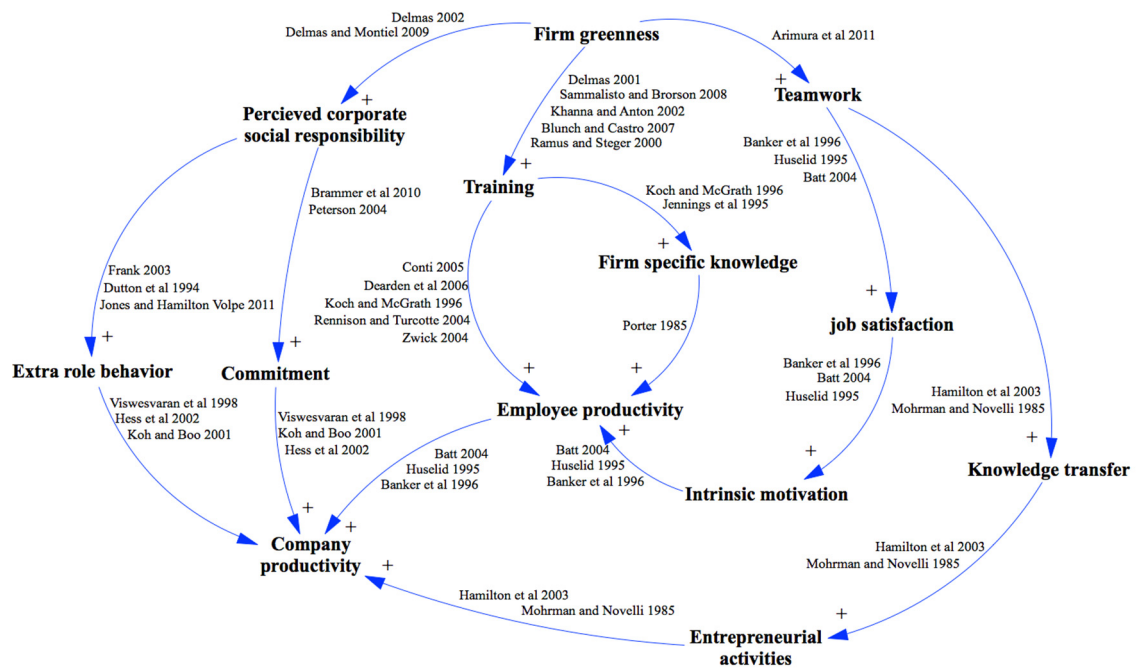

Figure 8. Causal relationships from the literature of Delmas and Pekovic (2012).

#### 1.3.2. Causal relationships from the results

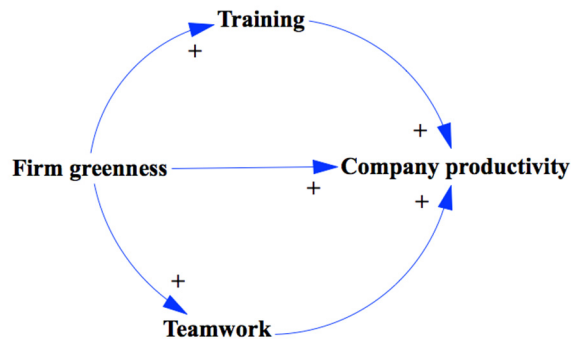

Figure 9. Causal relationships from the results of Delmas and Pekovic (2012).

#### 1.4. Birdi et al. (2008)

##### 1.4.1. Causal relationships from the literature

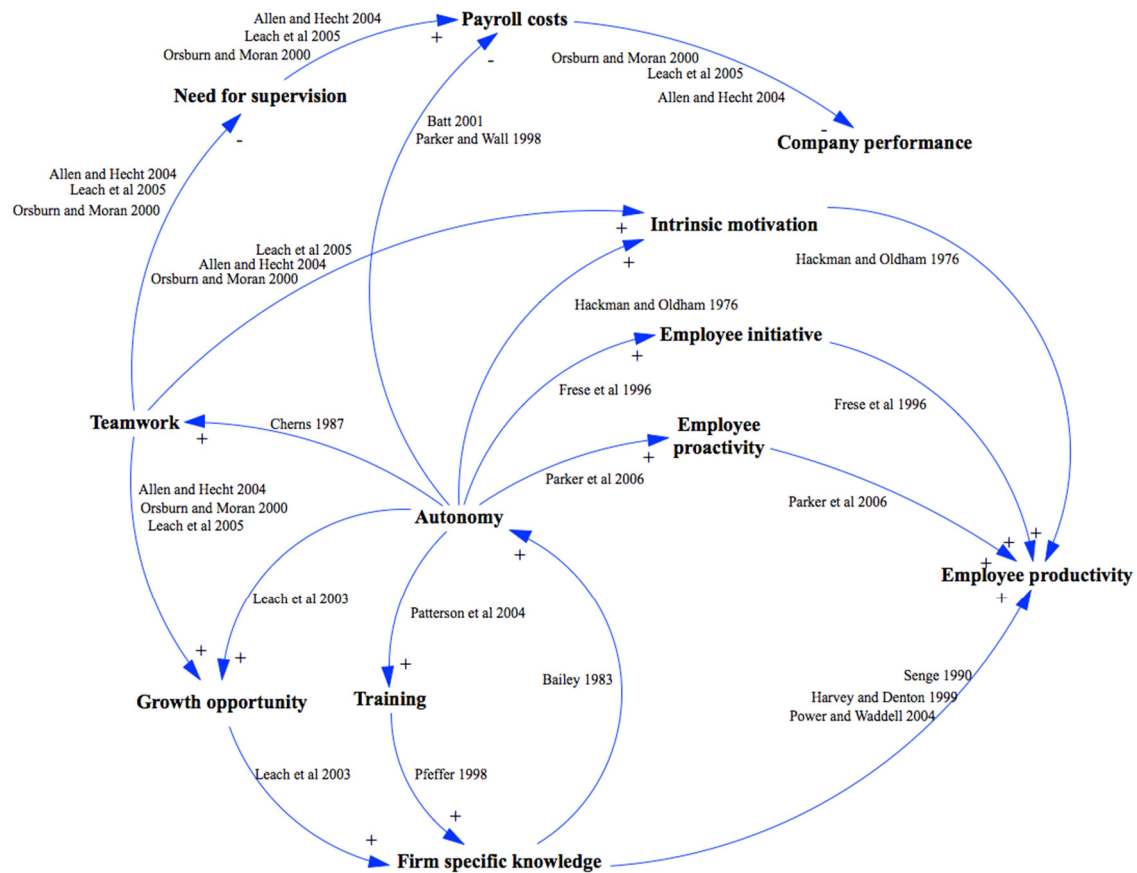

**Figure 10.** Causal relationships from the literature of Birdi et al. (2008).

##### 1.4.2. Causal relationships from results

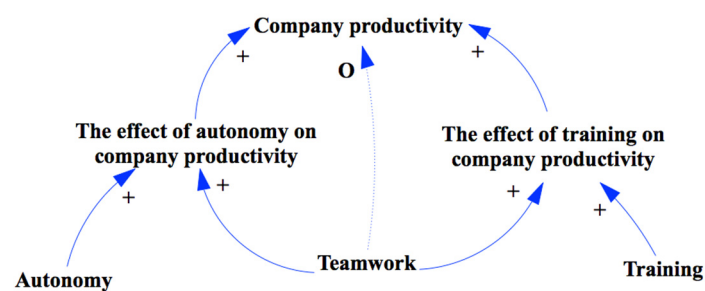

**Figure 11.** Causal relationships from the results of Birdi et al. (2008).

#### 1.5. Grant (2008)

##### 1.5.1. Causal relationships from the literature

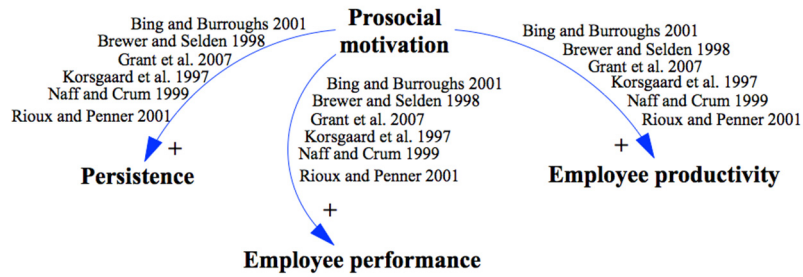

**Figure 12.** Causal relationships from the literature of Grant (2008).

### 1.5.2. Causal relationships from the results

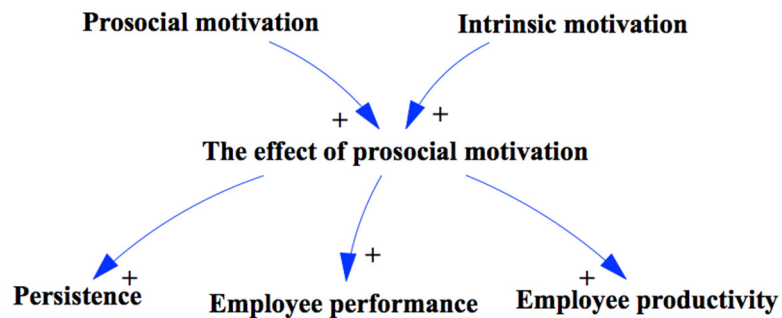

**Figure 13.** Causal relationships from the results of Grant (2007).

## 1.6. Probst et al. (2007)

### 1.6.1. Causal relationships from the literature

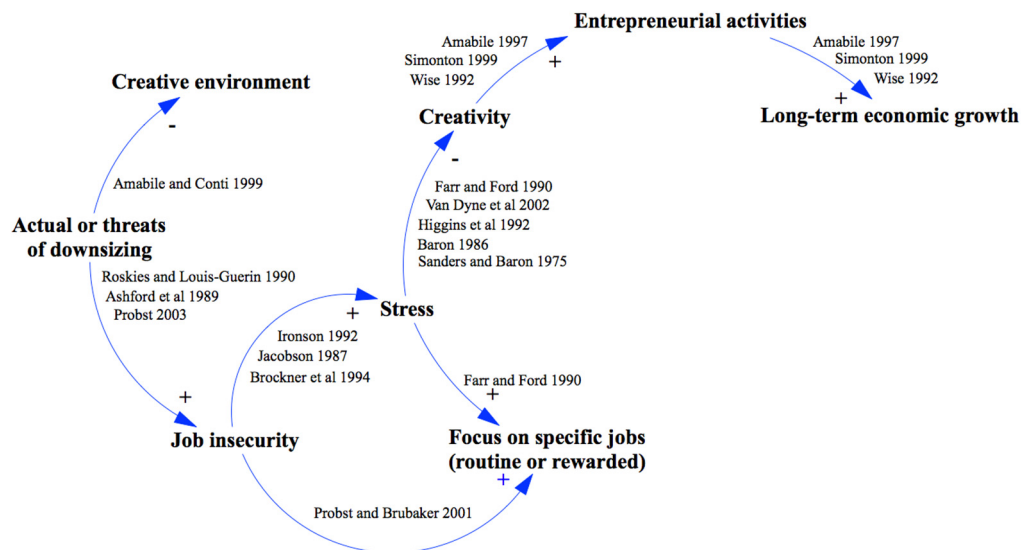

**Figure 14.** Causal relationships from the literature of Probst et al. (2007).

### 1.6.2. Causal relationships from the results

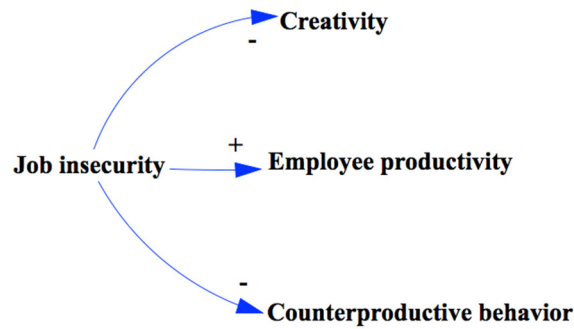

**Figure 15.** Causal relationships from the results of Probst et al. (2007).

## 1.7. Patterson et al. (2004)

### 1.7.1. Causal relationships from the literature

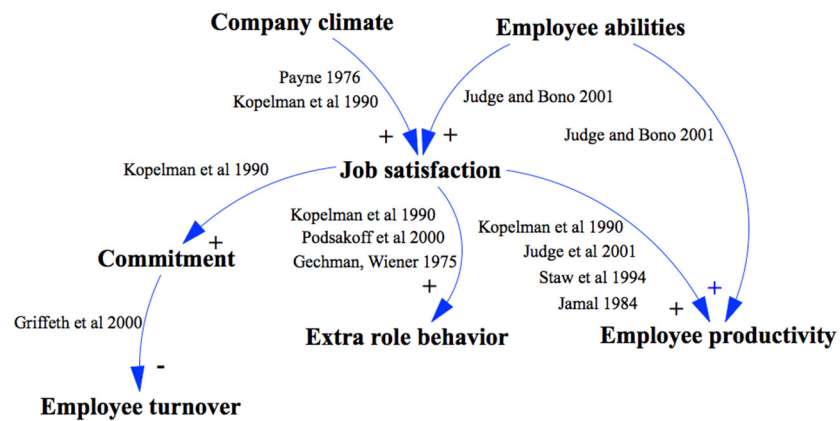

**Figure 16.** Causal relationships from the literature of Patterson et al. (2004).

### 1.7.2. Causal relationships from the results

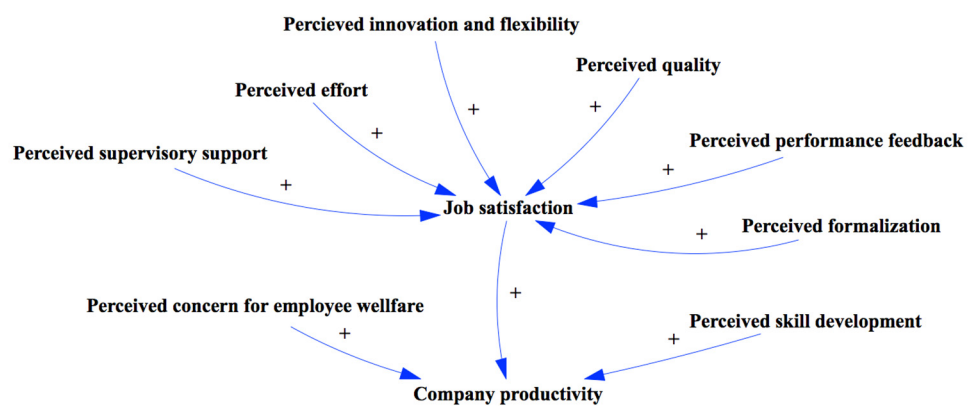

**Figure 17.** Causal relationships from the results of Paterson et al. (2004).

## 1.8. Dollard et al. (2000)

### 1.8.1. Causal relationships from the results

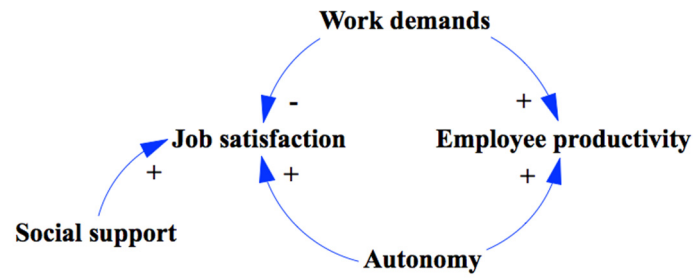

**Figure 18.** Causal relationships from the results of Dollard et al. (2000).

1.9. Podsakoff et al. (1997)

1.9.1. Causal relationships from the literature

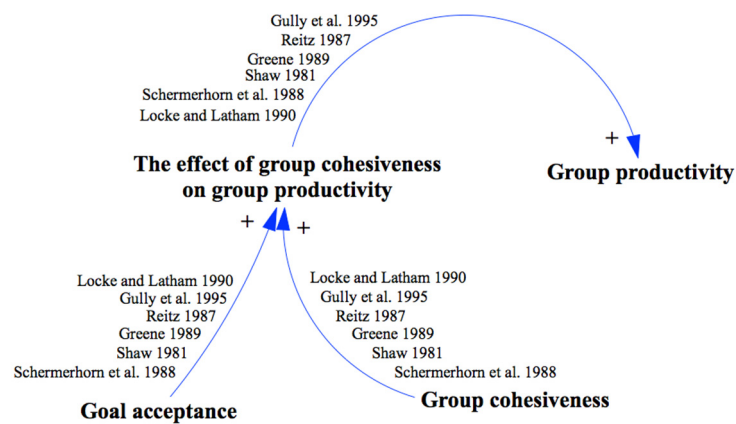

**Figure 19.** Causal relationships from the literature of Podsakoff et al. (1997).

1.9.2. Causal relationships from the results

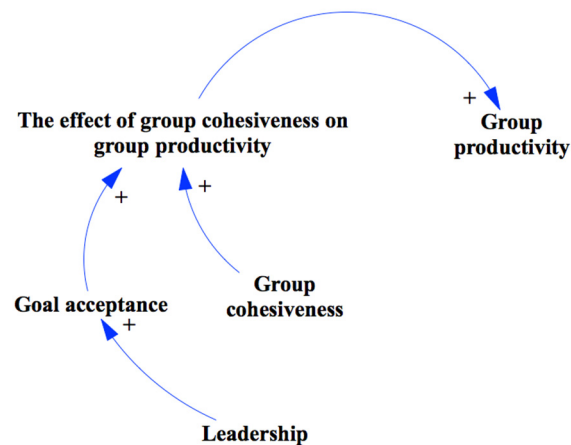

**Figure 20.** Causal relationships from the results of Podsakoff et al. (1997).

1.10. Aiello and Kolb (1995)

1.10.1. Causal relationships from the literature



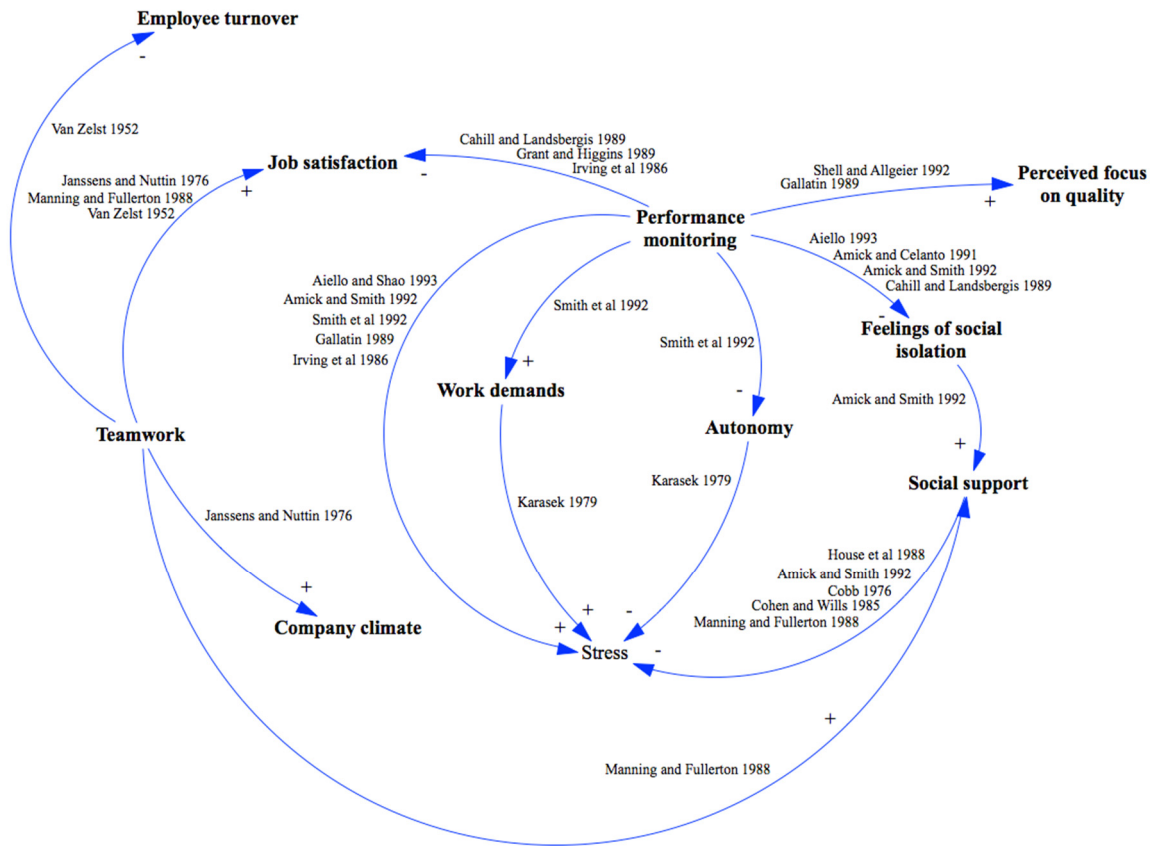

**Figure 21.** Causal relationships from the literature in Aiello and Kolb (1995).

### 1.10.2. Causal relationships from results

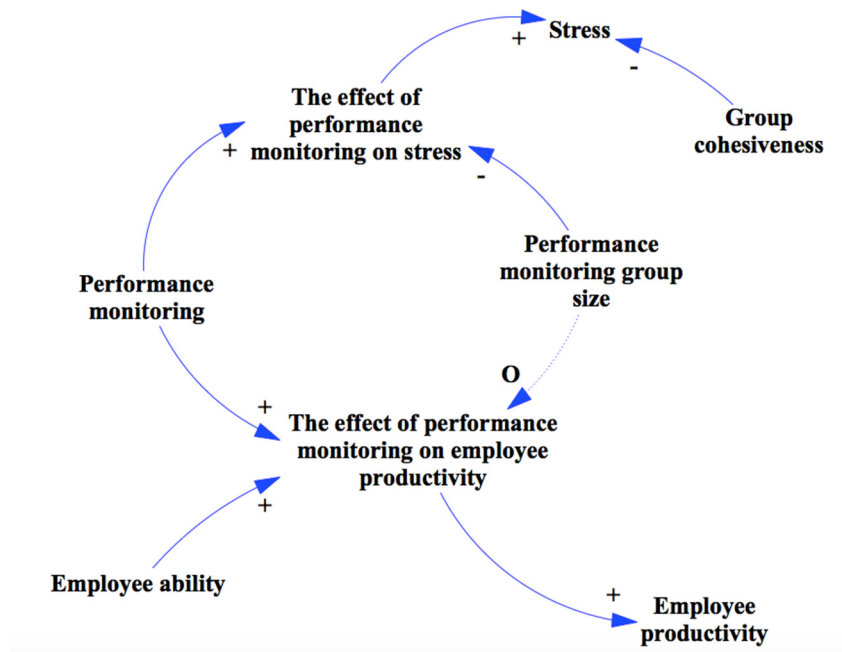

**Figure 22.** Causal relationships from the results of Aiello and Kolb (1995).

### 1.11. Wright et al. (1993)

### 1.11.1. Causal relationships from the literature



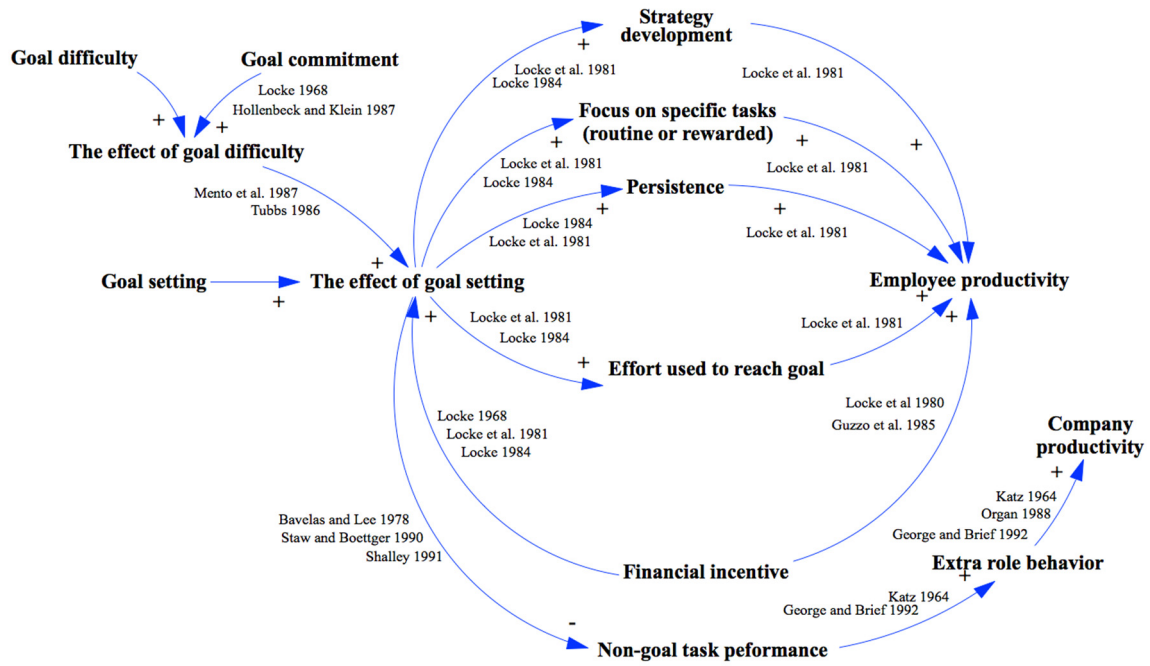

**Figure 23.** Causal relationships from the literature of Wright et al. (1993).

#### 1.11.2. Causal relationships from the results

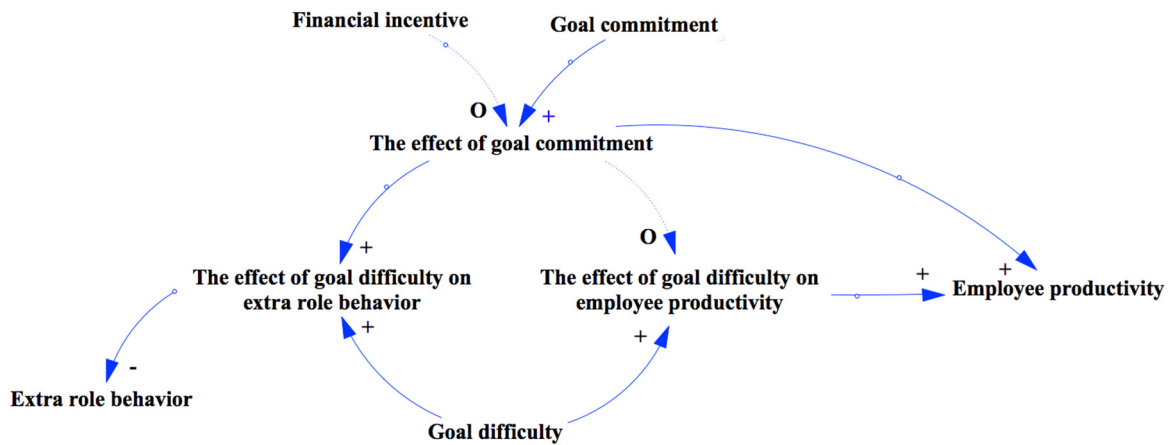

**Figure 24.** Causal relationships from the results of Wright et al. (1993).

#### 1.12. Goodman and Leyden (1991)

##### 1.12.1. Causal relationships from the literature

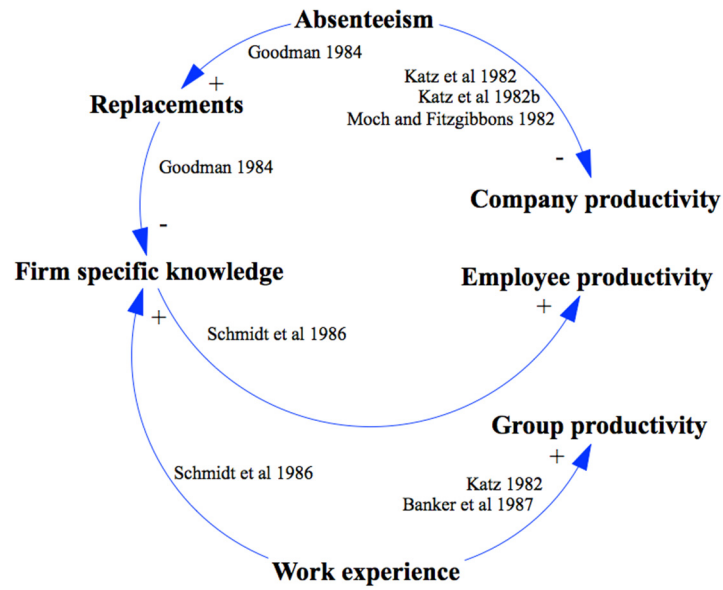

Figure 25. Causal relationships from the literature of Goodman and Leyden (1991).

#### 1.12.2. Causal relationships from the results

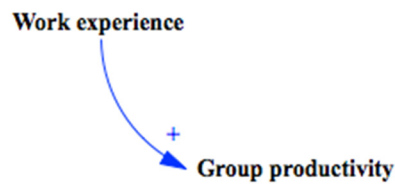

Figure 26. Causal relationships from the results of Goodman and Leyden (1991).

#### 1.13. Rodgers and Hunter (1991)

##### 1.13.1. Causal relationships from the literature

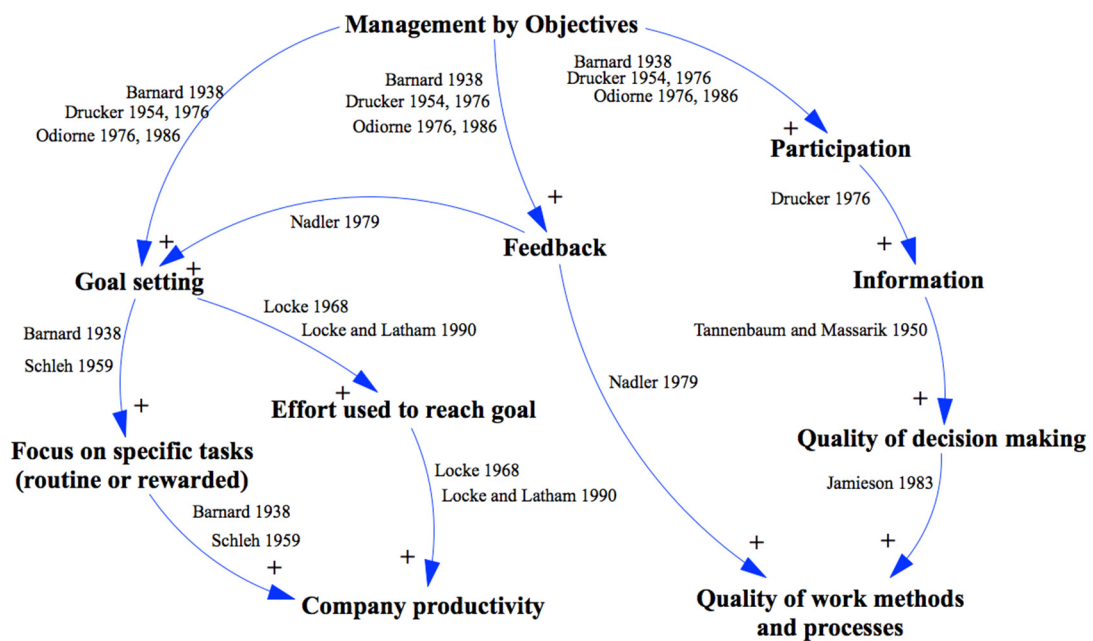

Figure 27. Causal relationships from the literature of Rodgers and Hunter (1991).

### 1.13.2. Causal relationships from the results

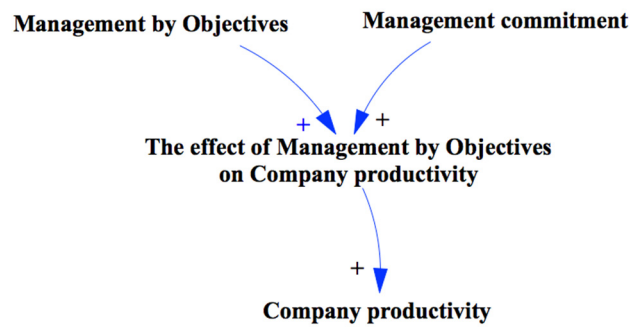

Figure 28. Causal relationships from the results of Rodgers and Hunter (1991).

### 1.14. Shalley (1991)

#### 1.14.1. Causal relationships from the literature

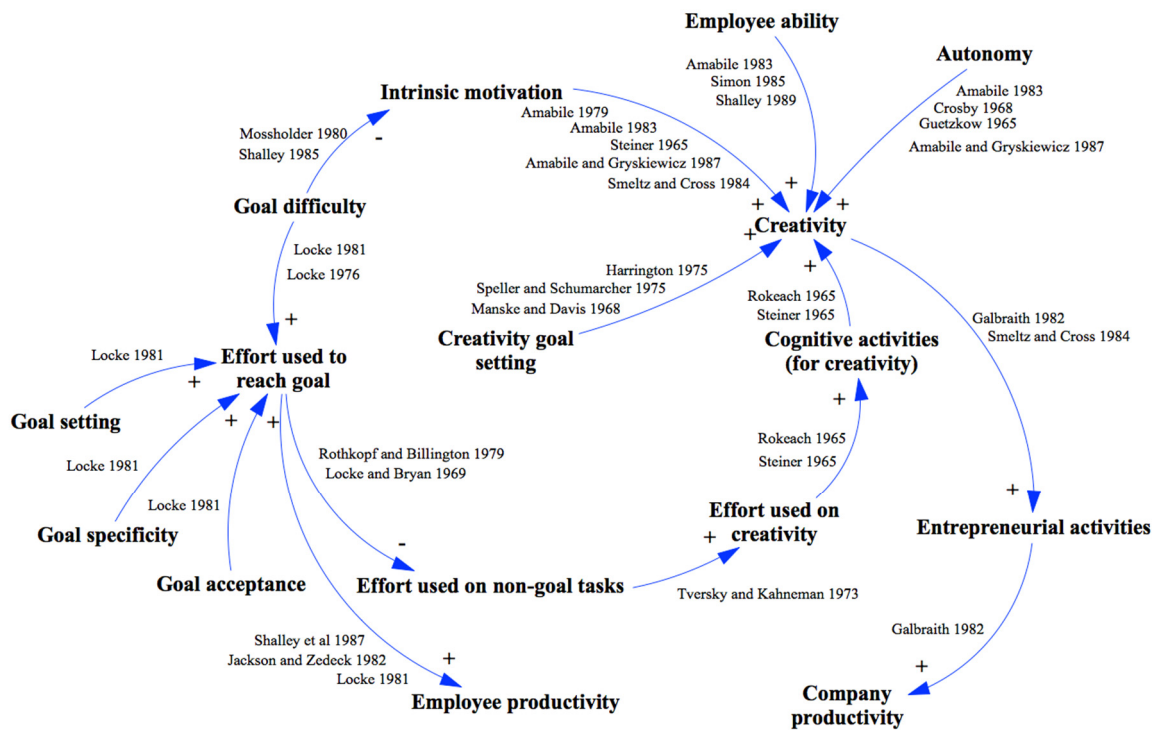

Figure 29. Causal relationships from the literature of Shalley (1991).

#### 1.14.2. Causal relationships from the results

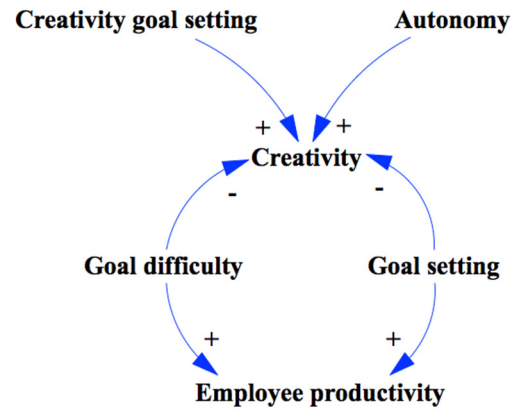

**Figure 30.** Causal relationships from the results of Shalley (1991).

### 1.15. Larson and Callahan (1990)

#### 1.15.1. Causal relationships from the literature

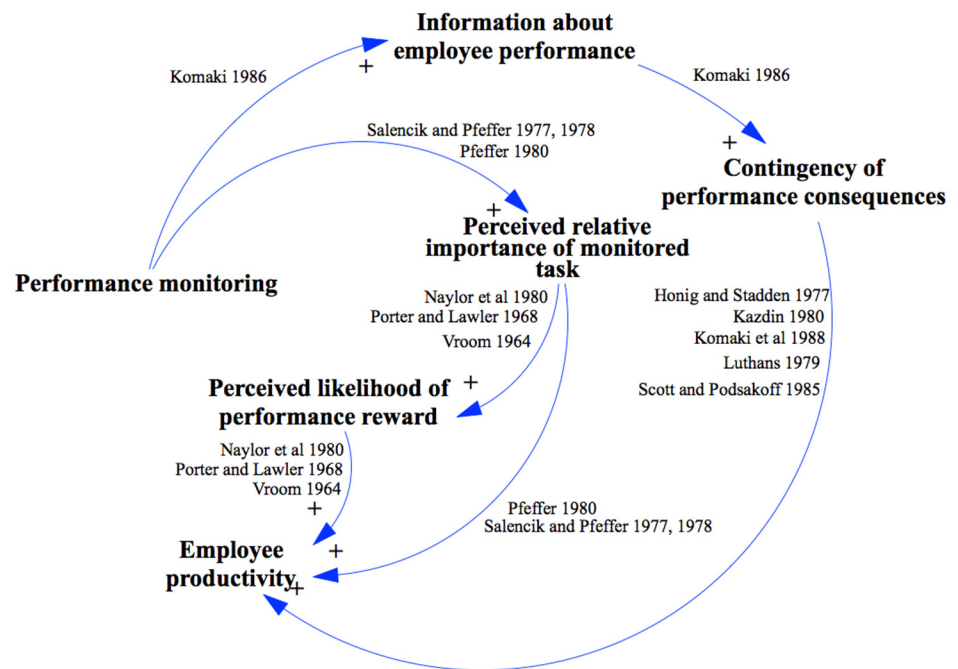

**Figure 31.** Causal relationships from the literature of Larson and Callahan (1990).

#### 1.15.2. Causal relationships from the results

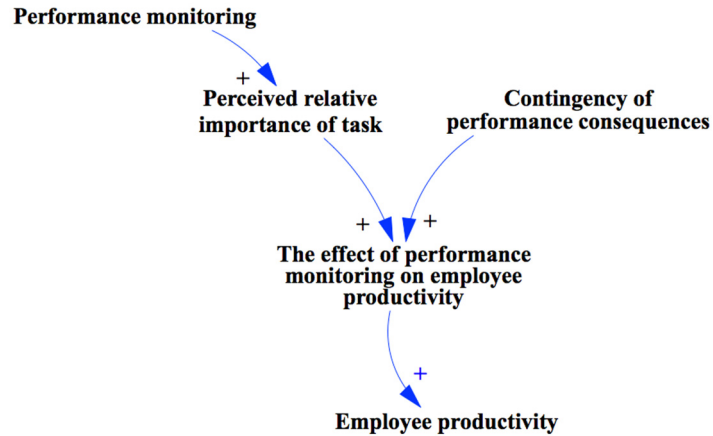

**Figure 32.** Causal relationships from the results of Larson and Callahan (1990).

### 1.16. Graen et al. (1986)

#### 1.16.1. Causal relationships from the literature

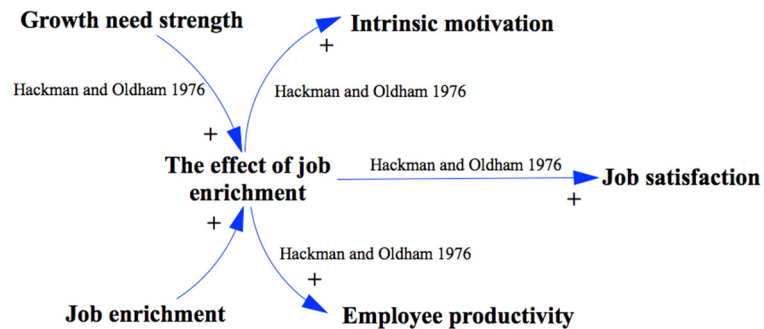

**Figure 33.** Causal relationships from the literature of Graen et al. (1986).

#### 1.16.2. Causal relationships from the results

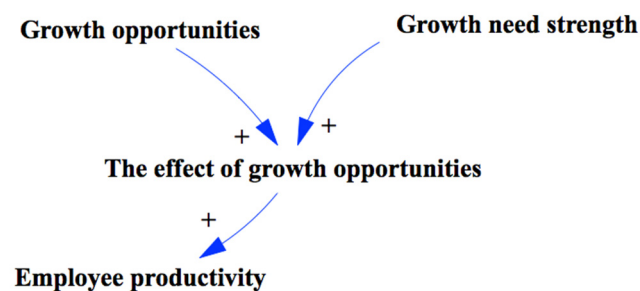

**Figure 34.** Causal relationships from the results of Graen et al. (1986).

### 1.17. Schmidt et al. (1986)

#### 1.17.1. Causal relationships from the results

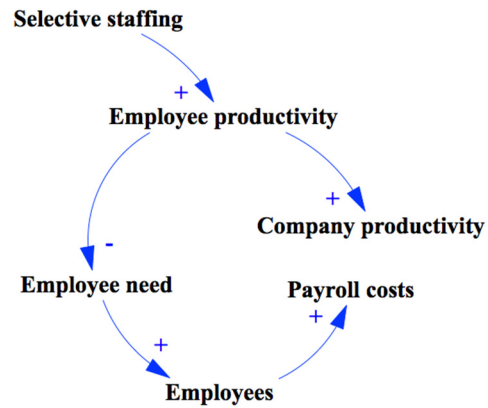

**Figure 35.** Causal relationships from the results of Schmidt et al. (1986).

1.18. Guzzo et al. (1985)

1.18.1. Causal relationships from the results

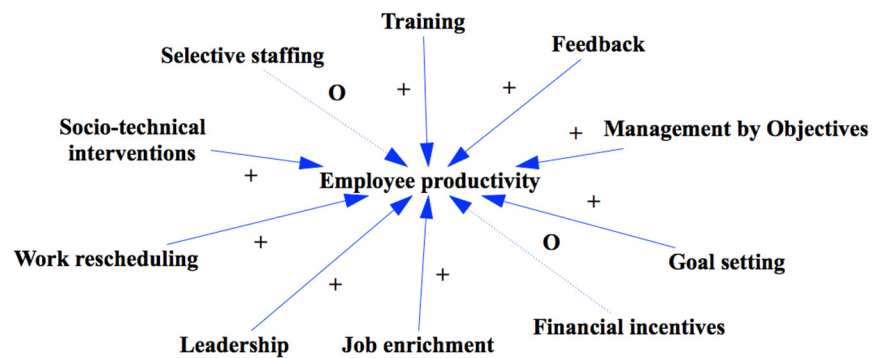

**Figure 36.** Causal relationships from the results of Guzzo et al. (1985).

1.19. Latham and Saari (1982)

1.19.1. Causal relationships from the results

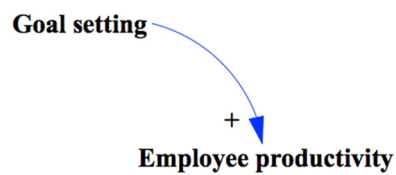

**Figure 37.** Causal relationships from the results of Latham and Saari (1982).

1.20. Schmidt et al. (1979)

1.20.1. Causal relationships from the results

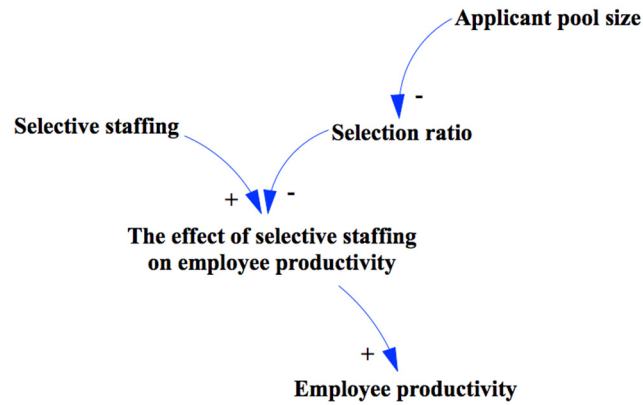

**Figure 38.** Causal relationships from the results of Schmidt et al. (1979).

### 1.21. Kazanas (1978)

#### 1.21.1. Causal relationships from the literature

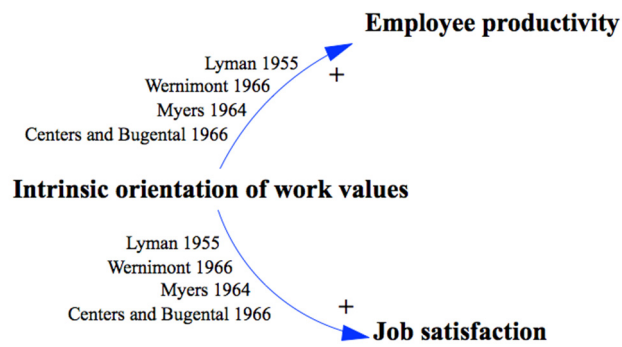

**Figure 39.** Causal relationships from the literature of Kazanas (1978).

### 1.22. Schein et al. (1977)

#### 1.22.1. Causal relationships from the results

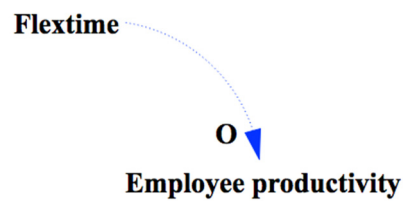

**Figure 40.** Causal relationships from the results of Schein et al. (1977).

### 1.23. Kim and Hamner (1976)

#### 1.23.1. Causal relationships from the literature



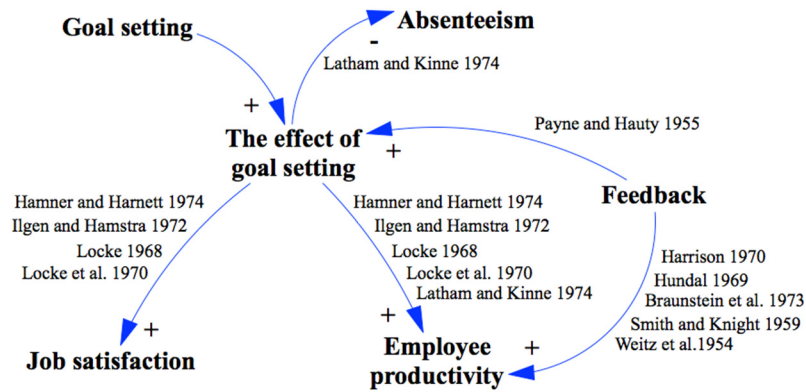

Figure 41. Causal relationships from the literature of Kim and Hamner (1976).

### 1.23.2. Causal relationships from the results

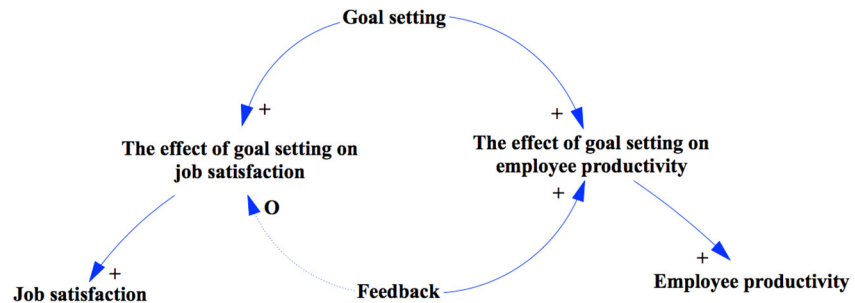

Figure 42. Causal relationships from the results of Kim and Hamner (1976).

### 1.24. Umstot et al. (1976)

#### 1.24.1. Causal relationships from the literature

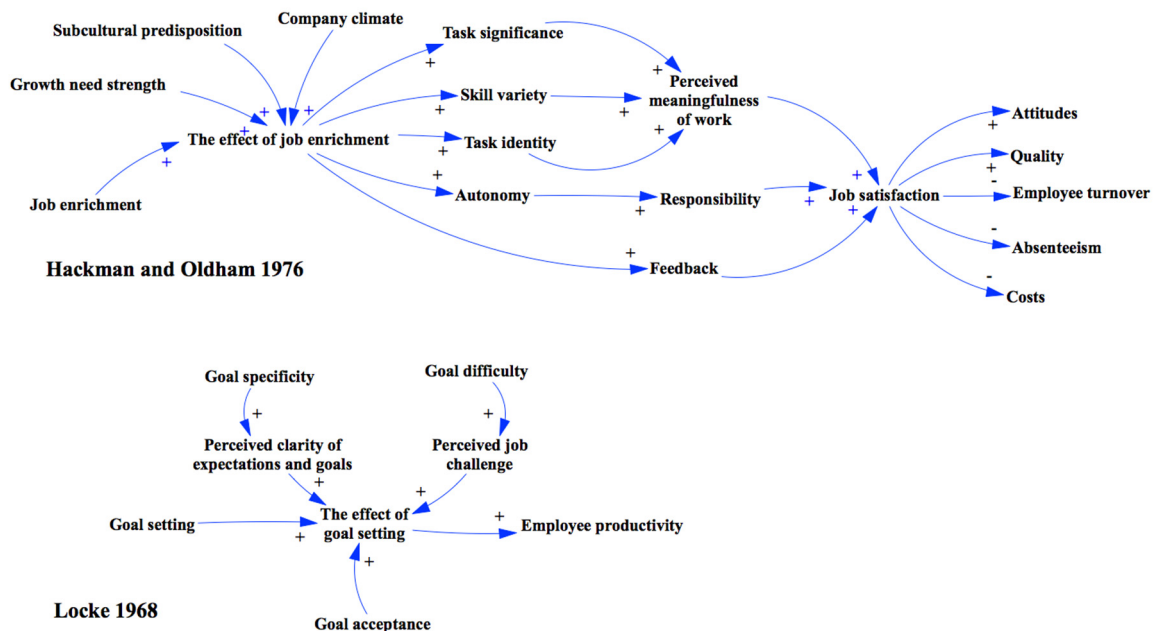

Figure 43. Causal relationships from the literature of Umstot et al. (1976).

### 1.24.2. Causal relationships from the results

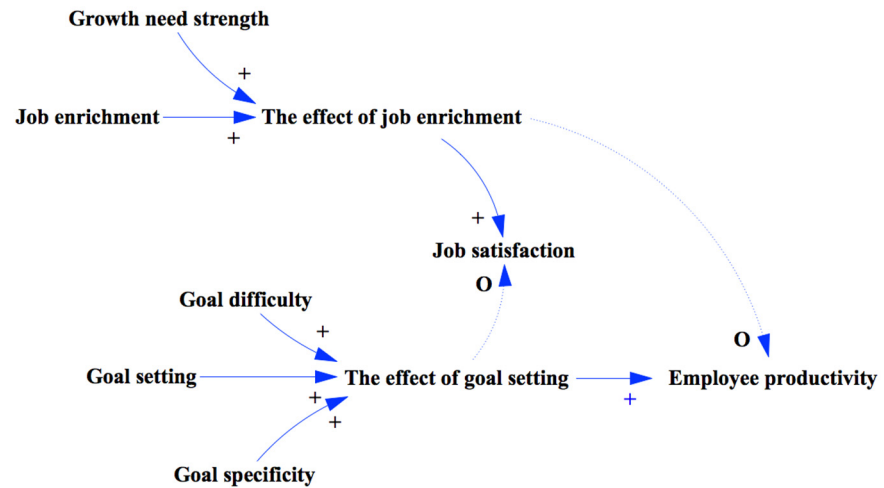

**Figure 44.** Causal relationships from the results of Umstot et al. (1976).

### 1.25. Latham and Locke (1975)

#### 1.25.1. Causal relationships from the literature

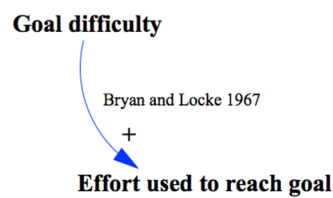

**Figure 45.** Causal relationships from the literature of Latham and Locke (1975).

#### 1.25.2. Causal relationships from the results

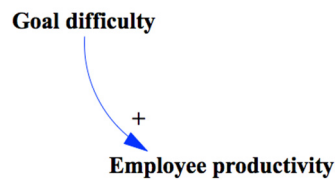

**Figure 46.** Causal relationships from the results of Latham and Locke (1975).

### 1.26. Weinstein and Holzbach (1973)

#### 1.26.1. Causal relationships from the results

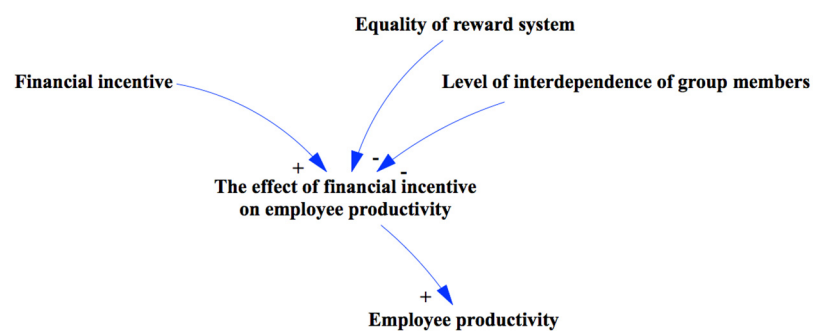

**Figure 47.** Causal relationships from the results of Weinstein and Holzbach (1973).

## 1.27. Rothe (1970)

### 1.27.1. Causal relationships from results

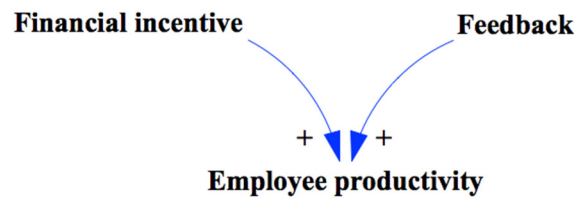

**Figure 48.** Causal relationships from the results of Rothe (1970).

## References

- Aguinis, H., & Kraiger, K. (2009). Benefits of Training and Development for Individuals and Teams, Organizations, and Society. In *Annual Review of Psychology* (Vol. 60, pp. 451-474).
- Aiello, J. R. (1993). COMPUTER-BASED WORK MONITORING - ELECTRONIC SURVEILLANCE AND ITS EFFECTS. *Journal of Applied Social Psychology*, 23(7), 499-507. doi:10.1111/j.1559-1816.1993.tb01100.x
- Aiello, J. R., & Kolb, K. J. (1995). ELECTRONIC PERFORMANCE MONITORING AND SOCIAL-CONTEXT - IMPACT ON PRODUCTIVITY AND STRESS. *Journal of Applied Psychology*, 80(3), 339-353. doi:10.1037/0021-9010.80.3.339
- Aiello, J. R., & Shao, Y. (1992). Computreized performance monitoring: Effects of monitoring salience and level, task difficulty and climate, feedback, and goal setting. Paper presented at the Seventh Conference of the Society for Industrial and Organizational Psychology, Montreal, Quebec, Canada.
- Allen, N. J., & Hecht, T. D. (2004). The 'romance of teams': Toward an understanding of its psychological underpinnings and implications. *Journal of Occupational and Organizational Psychology*, 77, 439-461. doi:10.1348/0963179042596469
- Amabile, T. M. (1979). Effects of external evaluation on artistic creativity. *Journal of Personality and Social Psychology*, 37(2), 221.
- Amabile, T. M. (1983). *The social psychology of creativity*. New York: Springer-Verlag.
- Amabile, T. M. (1997). Entrepreneurial creativity through motivational synergy. *Journal of Creative Behavior*, 31(1), 18-26.
- Amabile, T. M., & Gryskiewicz, S. S. (1987). Creativity in the R&D laboratory. Retrieved from Greensboro, NC:
- Amick, B. C., & Celentano, D. D. (1991). STRUCTURAL DETERMINANTS OF THE PSYCHOSOCIAL WORK-ENVIRONMENT - INTRODUCING TECHNOLOGY IN THE WORK STRESS FRAMEWORK. *Ergonomics*, 34(5), 625-646. doi:10.1080/00140139108967341
- Amick, B. C., & Smith, M. J. (1992). STRESS, COMPUTER-BASED WORK MONITORING AND MEASUREMENT SYSTEMS - A CONCEPTUAL OVERVIEW. *Applied Ergonomics*, 23(1), 6-16. doi:10.1016/0003-6870(92)90005-g
- Argote, L. (1999). *Organizational learning: Creting, retaining, and transferring knowledge*. Boston, MA: Kluwer Academic Publishers.
- Arimura, T. H., Darnall, N., & Katayama, H. (2011). Is ISO 14001 a gateway to more advanced voluntary action? The case of green supply chain management. *Journal of Environmental Economics and Management*, 61(2), 170-182.
- Arthur, J. B. (1994). EFFECTS OF HUMAN-RESOURCE SYSTEMS ON MANUFACTURING PERFORMANCE AND TURNOVER. *Academy of Management Journal*, 37(3), 670-687. doi:10.2307/256705
- Arthur, W., Bennett, W., Edens, P. S., & Bell, S. T. (2003). Effectiveness of training in organizations: A meta-analysis of design and evaluation features. *Journal of Applied Psychology*, 88(2), 234-245. doi:10.1037/0021-9010.88.2.234
- Ashford, S. J., Lee, C., & Bobko, P. (1989). CONTENT, CAUSES, AND CONSEQUENCES OF JOB INSECURITY - A THEORY-BASED MEASURE AND SUBSTANTIVE TEST. *Academy of Management Journal*, 32(4), 803-829. doi:10.2307/256569
- Bailey, T. (1983). Discretionary effort and the organization of work: Employee participation and work reform since Hawthorne. Working paper. Columbia University, New York.
- Banker, R. D., Field, J. M., Schroeder, R. G., & Sinha, K. K. (1996). Impact of work teams on manufacturing performance: A longitudinal field study. *Academy of Management Journal*, 39(4), 867-890. doi:10.2307/256715
- Banker, R. D., & Kemerer, C. F. (1987). Factors Affecting Software Maintenance Productivity: an Exploratory Study. Paper presented at the ICIS.
- Barnard, C. I. (1938). *The functions of the executive*. Cambridge, MA: Harvard University Press.
- Baron, R. S. (1986). Distraction-conflict theory: Progress and problems. *Advances in experimental social psychology*, 19, 1-40.
- Batt, R. (2001). The economics of teams among technicians. *British Journal of Industrial Relations*, 39(1), 1-24. doi:10.1111/1467-8543.00187
- Batt, R. (2004). Who benefits from teams? Comparing workers, supervisors, and managers. *Industrial Relations*, 43(1), 183-212. doi:10.1111/j.0019-8676.2004.00323.x
- Batt, R., & Colvin, A. J. S. (2011). AN EMPLOYMENT SYSTEMS APPROACH TO TURNOVER: HUMAN RESOURCES PRACTICES, QUILTS, DISMISSALS, AND PERFORMANCE. *Academy of Management Journal*, 54(4), 695-717.
- Bavelas, J., & Lee, E. S. (1978). EFFECTS OF GOAL LEVEL ON PERFORMANCE - TRADE-OFF OF QUANTITY AND QUALITY. *Canadian Journal of Psychology-Revue Canadienne De Psychologie*, 32(4), 219-240. doi:10.1037/h0081692

- Bell, S. T., Villado, A. J., Lukasik, M. A., Belau, L., & Briggs, A. L. (2011). Getting Specific about Demographic Diversity Variable and Team Performance Relationships: A Meta-Analysis. *Journal of Management*, 37(3), 709-743. doi:10.1177/0149206310365001
- Bing, M. N., & Burroughs, S. M. (2001). The predictive and interactive effects of equity sensitivity in teamwork-oriented organizations. *Journal of Organizational Behavior*, 22(3), 271-290. doi:10.1002/job.68
- Birdi, K., Clegg, C., Patterson, M., Robinson, A., Stride, C. B., Wall, T. D., & Wood, S. J. (2008). The impact of human resource and operational management practices on company productivity: A longitudinal study. *Personnel Psychology*, 61(3), 467-501. doi:10.1111/j.1744-6570.2008.00136.x
- Blunch, N.-H., & Castro, P. (2007). Enterprise-level training in developing countries: do international standards matter?\*. *International Journal of Training and Development*, 11(4), 314-324. doi:10.1111/j.1468-2419.2007.00284.x
- Boehm, S. A., Dwertmann, D. J. G., Kunze, F., Michaelis, B., Parks, K. M., & McDonald, D. P. (2014). Expanding Insights on the Diversity Climate-Performance Link: The Role of Workgroup Discrimination and Group Size. *Human Resource Management*, 53(3), 379-402. doi:10.1002/hrm.21589
- Brammer, S., Millington, A., & Rayton, B. (2007). The contribution of corporate social responsibility to organizational commitment. *International Journal of Human Resource Management*, 18(10), 1701-1719. doi:10.1080/09585190701570866
- Braunstein, D. N., Klein, G. A., & Pachla, M. (1973). FEEDBACK EXPECTANCY AND SHIFTS IN STUDENT RATINGS OF COLLEGE FACULTY. *Journal of Applied Psychology*, 58(2), 254-258. doi:10.1037/h0035631
- Brewer, G. A., & Selden, S. C. (1998). Whistle Blowers in the Federal Civil Service: New Evidence of the Public Service Ethic. *Journal of Public Administration Research and Theory*, 8(3), 413-440. doi:10.1093/oxfordjournals.jpart.a024390
- Brockner, J., Konovsky, M., Cooperschneider, R., Folger, R., Martin, C., & Bies, R. J. (1994). INTERACTIVE EFFECTS OF PROCEDURAL JUSTICE AND OUTCOME NEGATIVITY ON VICTIMS AND SURVIVORS OF JOB LOSS. *Academy of Management Journal*, 37(2), 397-409. doi:10.2307/256835
- Bryan, J. F., & Locke, E. A. (1967). Parkinson's Law as a goal-setting phenomenon. *Organizational Behavior and Human Performance*, 2(3), 258-275. doi:http://dx.doi.org/10.1016/0030-5073(67)90021-9
- Cahill, J., & Landsbergis, P. A. (1989). Electronic monitoring: Analysis of current practices and implications for occupational stress. Paper presented at the meeting of the American Public Health Association, Chicago.
- Carton, A. M., & Cummings, J. N. (2012). A THEORY OF SUBGROUPS IN WORK TEAMS. *Academy of Management Review*, 37(3), 441-470. doi:10.5465/amr.2009.0322
- Cascio, W. F., & Boudreau, J. W. (2008). Investing in people: Financial impact of human resource initiatives. Upper Saddle River, NJ: FT Press.
- Centers, R., & Bugental, D. E. (1966). INTRINSIC AND EXTRINSIC JOB MOTIVATIONS AMONG DIFFERENT SEGMENTS OF WORKING POPULATION. *Journal of Applied Psychology*, 50(3), 193-&. doi:10.1037/h0023420
- Cherns, A. (1987). PRINCIPLES OF SOCIOTECHNICAL DESIGN REVISTED. *Human Relations*, 40(3), 153-162. doi:10.1177/001872678704000303
- Cherrington, D. J., Condie, S. J., & England, J. L. (1979). AGE AND WORK VALUES. *Academy of Management Journal*, 22(3), 617-623. doi:10.2307/255750
- Cobb, S. (1976). SOCIAL SUPPORT AS A MODERATOR OF LIFE STRESS. *Psychosomatic Medicine*, 38(5), 300-314.
- Cohen, S., & Wills, T. A. (1985). STRESS, SOCIAL SUPPORT, AND THE BUFFERING HYPOTHESIS. *Psychological Bulletin*, 98(2), 310-357. doi:10.1037//0033-2909.98.2.310
- Conti, G. (2005). Training, productivity and wages in Italy. *Labour Economics*, 12(4), 557-576. doi:10.1016/j.labeco.2005.05.007
- Crosby, A. (1968). Creativity and performance in industrial organization. London: Tavistock.
- De Meulenaere, K., Boone, C., & Buyl, T. (2016). Unraveling the impact of workforce age diversity on labor productivity: The moderating role of firm size and job security. *Journal of Organizational Behavior*, 37(2), 193-212. doi:10.1002/job.2036
- Dearden, L., Reed, H., & Van Reenen, J. (2006). The impact of training on productivity and wages: Evidence from british panel data. *Oxford Bulletin of Economics and Statistics*, 68(4), 397-421. doi:10.1111/j.1468-0084.2006.00170.x
- DeChurch, L. A., & Mesmer-Magnus, J. R. (2010). The Cognitive Underpinnings of Effective Teamwork: A Meta-Analysis. *Journal of Applied Psychology*, 95(1), 32-53. doi:10.1037/a0017328
- Delery, J. E., & Doty, D. H. (1996). Modes of theorizing in strategic human resource management: Tests of universalistic, contingency, and configurational performance predictions. *Academy of Management Journal*, 39(4), 802-835. doi:10.2307/256713
- Delmas, M. (2001). Stakeholders and competitive advantage: the case of ISO 14001. *Production and Operations Management*, 10(3), 343-358.
- Delmas, M., & Montiel, I. (2009). Greening the Supply Chain: When Is Customer Pressure Effective ? *Journal of Economics & Management Strategy*, 18(1), 171-201. doi:10.1111/j.1530-9134.2009.00211.x
- Delmas, M. A. (2002). The diffusion of environmental management standards in Europe and in the United States: An institutional perspective. *Policy Sciences*, 35(1), 91-119. doi:10.1023/a:1016108804453
- Delmas, M. A., & Pekovic, S. (2013). Environmental standards and labor productivity: Understanding the mechanisms that sustain sustainability. *Journal of Organizational Behavior*, 34(2), 230-252.
- Dollard, M. F., Winefield, H. R., Winefield, A. H., & de Jonge, J. (2000). Psychosocial job strain and productivity in human service workers: A test of the demand-control-support model. *Journal of Occupational and Organizational Psychology*, 73, 501-510. doi:10.1348/096317900167182
- Drucker, P. F. (1954). The practice of management. New York: Harper.

- Drucker, P. F. (1976). What Results Should You Expect? A Users' Guide to MBO. *Public Administration Review*, 36(1), 12-19. doi:10.2307/974736
- Dutton, J. E., Dukerich, J. M., & Harquail, C. V. (1994). ORGANIZATIONAL IMAGES AND MEMBER IDENTIFICATION. *Administrative Science Quarterly*, 39(2), 239-263. doi:10.2307/2393235
- Evans, W. R., & Davis, W. D. (2005). High-performance work systems and organizational performance: The mediating role of internal social structure. *Journal of Management*, 31(5), 758-775. doi:10.1177/0149206305279370
- Farr, J. L., & Ford, C. M. (1990). Individual innovation. In M. A. West & J. L. Farr (Eds.), *Innovation and creativity at work*. Chichester, UK: Wiley.
- Feldman, M. S., & Pentland, B. T. (2003). Reconceptualizing organizational routines as a source of flexibility and change. *Administrative Science Quarterly*, 48(1), 94-118. doi:10.2307/3556620
- Felin, T., Zenger, T. R., & Tomsik, J. (2009). THE KNOWLEDGE ECONOMY: EMERGING ORGANIZATIONAL FORMS, MISSING MICROFOUNDATIONS, AND KEY CONSIDERATIONS FOR MANAGING HUMAN CAPITAL. *Human Resource Management*, 48(4), 555-570. doi:10.1002/hrm.20299
- Frank, R. H. (2003). *What price the moral high ground? Ethical dilemmas in competitive environments*. Princeton, NJ: Princeton University Press.
- Frese, M., Kring, W., Soose, A., & Zempel, J. (1996). Personal initiative at work: Differences between East and West Germany. *Academy of Management Journal*, 39(1), 37-63. doi:10.2307/256630
- Galbraith, J. R. (1982). Designing the innovating organization. *Organizational dynamics*, 10(3), 5-25.
- Gallatin, L. (1989). Electronic monitoring in the workplace: Supervision or surveillance? Retrieved from Boston:
- Galunic, D. C., & Anderson, E. (2000). From security to mobility: Generalized investments in human capital and agent commitment. *Organization Science*, 11(1), 1-20. doi:10.1287/orsc.11.1.1.12565
- George, J. M., & Brief, A. P. (1992). FEELING GOOD DOING GOOD - A CONCEPTUAL ANALYSIS OF THE MOOD AT WORK ORGANIZATIONAL SPONTANEITY RELATIONSHIP. *Psychological Bulletin*, 112(2), 310-329. doi:10.1037/0033-2909.112.2.310
- Goodman, P. S. (1984). *Absenteeism: New approaches to understanding, measuring and managing employee absence*. San Francisco: Jossey-Bass.
- Goodman, P. S., & Leyden, D. P. (1991). FAMILIARITY AND GROUP PRODUCTIVITY. *Journal of Applied Psychology*, 76(4), 578-586. doi:10.1037/0021-9010.76.4.578
- Graen, G. B., Scandura, T. A., & Graen, M. R. (1986). A FIELD EXPERIMENTAL TEST OF THE MODERATING EFFECTS OF GROWTH NEED STRENGTH ON PRODUCTIVITY. *Journal of Applied Psychology*, 71(3), 484-491. doi:10.1037/0021-9010.71.3.484
- Grant, A. M. (2007). Relational job design and the motivation to make a prosocial difference. *Academy of Management Review*, 32(2), 393-417.
- Grant, A. M. (2008). Does intrinsic motivation fuel the prosocial fire? Motivational synergy in predicting persistence, performance, and productivity. *Journal of Applied Psychology*, 93(1), 48-58. doi:10.1037/0021-9010.93.1.48
- Grant, R., & Higgins, C. (1989). Monitoring service workers via computer: The effect on employees, productivity, and service. *National Productivity Review*, 8(2), 101-112. doi:10.1002/npr.4040080203
- Greene, C. N. (1989). COHESION AND PRODUCTIVITY IN WORK GROUPS. *Small Group Behavior*, 20(1), 70-86. doi:10.1177/104649648902000106
- Grund, C., & Westergaard-Nielsen, N. (2008). Age structure of the workforce and firm performance. *International Journal of Manpower*, 29(5-6), 410-422. doi:10.1108/01437720810888553
- Guetzkow, H. (1965). The creative person in organizations. In G. A. Steiner (Ed.), *The creative organization* (pp. 35-49). Chicago: University of Chicago Press.
- Guion, R. M. (2011). *Assessment, measurement, and prediction for personnel decisions*: Taylor & Francis.
- Gully, S. M., Devine, D. J., & Whitney, D. J. (1995). A METAANALYSIS OF COHESION AND PERFORMANCE - EFFECTS OF LEVEL OF ANALYSIS AND TASK INTERDEPENDENCE. *Small Group Research*, 26(4), 497-520. doi:10.1177/1046496495264003
- Guzzo, R. A., Jette, R. D., & Katzell, R. A. (1985). THE EFFECTS OF PSYCHOLOGICALLY BASED INTERVENTION PROGRAMS ON WORKER PRODUCTIVITY - A META-ANALYSIS. *Personnel Psychology*, 38(2), 275-291. doi:10.1111/j.1744-6570.1985.tb00547.x
- Hackman, J. R., & Oldham, G. R. (1976). MOTIVATION THROUGH DESIGN OF WORK - TEST OF A THEORY. *Organizational Behavior and Human Performance*, 16(2), 250-279. doi:10.1016/0030-5073(76)90016-7
- Hambrick, D. C., & Mason, P. A. (1984). UPPER ECHELONS - THE ORGANIZATION AS A REFLECTION OF ITS TOP MANAGERS. *Academy of Management Review*, 9(2), 193-206. doi:10.2307/258434
- Hamilton, B. H., Nickerson, J. A., & Owan, H. (2003). Team incentives and worker heterogeneity: An empirical analysis of the impact of teams on productivity and participation. *Journal of Political Economy*, 111(3), 465-497. doi:10.1086/374182
- Hamner, W. C., & Harnett, D. L. (1974). GOAL SETTING, PERFORMANCE AND SATISFACTION IN AN INTERDEPENDENT TASK. *Organizational Behavior and Human Performance*, 12(2), 217-230.
- Harrington, D. M. (1975). EFFECTS OF EXPLICIT INSTRUCTIONS TO BE CREATIVE ON PSYCHOLOGICAL MEANING OF DIVERGENT THINKING TEST-SCORES. *Journal of Personality*, 43(3), 434-454. doi:10.1111/j.1467-6494.1975.tb00715.x
- Harrison, D. A., & Klein, K. J. (2007). What's the difference? Diversity constructs as separation, variety, or disparity in organizations. *Academy of Management Review*, 32(4), 1199-1228.

- Harrison, W. (1970). Changes in behavior and attitude as a result of receiving feedback and participating in group counseling. Unpublished doctoral dissertation. West Virginia University.
- Harvey, C., & Denton, J. (1999). To come of age: The antecedents of organizational learning. *Journal of Management Studies*, 36(7), 897-918. doi:10.1111/1467-6486.00163
- Hess, D., Rogovsky, N., & Dunfee, T. W. (2002). The next wave of corporate community involvement: Corporate social initiatives. *California Management Review*, 44(2), 110-+.
- Higgins, L. F., Qualls, S. H., & Couger, J. D. (1992). THE ROLE OF EMOTIONS IN EMPLOYEE CREATIVITY. *Journal of Creative Behavior*, 26(2), 119-129.
- Hollenbeck, J. R., & Klein, H. J. (1987). GOAL COMMITMENT AND THE GOAL-SETTING PROCESS - PROBLEMS, PROSPECTS, AND PROPOSALS FOR FUTURE-RESEARCH. *Journal of Applied Psychology*, 72(2), 212-220. doi:10.1037/0021-9010.72.2.212
- Honig, W. K., & Stadden, J. E. R. (1977). *Handbook of operant behavior*. Englewood Cliffs, NJ: Prentice-Hall.
- Horn, J. L., & Cattell, R. B. (1967). AGE DIFFERENCES IN FLUID AND CRYSTALLIZED INTELLIGENCE. *Acta Psychologica*, 26(2), 107-&. doi:10.1016/0001-6918(67)90011-x
- Horwitz, S. K., & Horwitz, I. B. (2007). The effects of team diversity on team outcomes: A meta-analytic review of team demography. *Journal of Management*, 33(6), 987-1015. doi:10.1177/0149206307308587
- House, J. S., Landis, K. R., & Umberson, D. (1988). SOCIAL RELATIONSHIPS AND HEALTH. *Science*, 241(4865), 540-545. doi:10.1126/science.3399889
- Hundal, P. (1969). Knowledge of performance as an incentive in repetitive industrial work. *Journal of Applied Psychology*, 53(3p1), 224.
- Huselid, M. A. (1995). THE IMPACT OF HUMAN-RESOURCE MANAGEMENT-PRACTICES ON TURNOVER, PRODUCTIVITY, AND CORPORATE FINANCIAL PERFORMANCE. *Academy of Management Journal*, 38(3), 635-672. doi:10.2307/256741
- Ilgén, D. R., & Hamstra, B. W. (1972). PERFORMANCE SATISFACTION AS A FUNCTION OF DIFFERENCE BETWEEN EXPECTED AND REPORTED PERFORMANCE AT 5 LEVELS OF REPORTED PERFORMANCE. *Organizational Behavior and Human Performance*, 7(3), 359-370. doi:10.1016/0030-5073(72)90022-0
- Ironson, G. H. (1992). Job stress and health. In C. J. Cranny, P. C. Smith, & E. F. Stone (Eds.), *Job satisfaction: How people feel about their jobs and how it affects their performance*. New York: Lexington Books.
- Irving, R. H., Higgins, C. A., & Safayeni, F. R. (1986). COMPUTERIZED PERFORMANCE MONITORING SYSTEMS - USE AND ABUSE. *Communications of the Acm*, 29(8), 794-801. doi:10.1145/6424.6430
- Jackson, S. E., & Zedeck, S. (1982). EXPLAINING PERFORMANCE VARIABILITY - CONTRIBUTIONS OF GOAL SETTING, TASK CHARACTERISTICS, AND EVALUATIVE CONTEXTS. *Journal of Applied Psychology*, 67(6), 759-768. doi:10.1037/0021-9010.67.6.759
- Jacobson, D. (1987). A PERSONOLOGICAL STUDY OF THE JOB INSECURITY EXPERIENCE. *Social Behaviour*, 2(3), 143-155.
- Jamieson, B. D. (1973). Behavioral Problems with Management by Objectives. *The Academy of Management Journal*, 16(3), 496-505. doi:10.2307/255009
- Janssens, L., & Nuttin, J. R. (1976). FREQUENCY PERCEPTION OF INDIVIDUAL AND GROUP SUCCESSES AS A FUNCTION OF COMPETITION, COACTION, AND ISOLATION. *Journal of Personality and Social Psychology*, 34(5), 830-836.
- Jennings, P. D., & Moore, L. F. (1995). Human resource management on the Pacific Rim: An integration. In L. F. Moore & P. D. Jennings (Eds.), *Human resource management on the Pacific Rim: Institutions, practices, and attitudes*. Berlin: de Gruyter.
- Jones, C., & Volpe, E. H. (2011). Organizational identification: Extending our understanding of social identities through social networks. *Journal of Organizational Behavior*, 32(3), 413-434. doi:10.1002/job.694
- Judge, T. A., & Bono, J. E. (2001). Relationship of core self-evaluations traits-self-esteem, generalized self-efficacy, locus of control, and emotional stability-with job satisfaction and job performance: A meta-analysis. *Journal of Applied Psychology*, 86(1), 80-92. doi:10.1037/0021-9010.86.1.80
- Karasek, R. A. (1979). JOB DEMANDS, JOB DECISION LATITUDE, AND MENTAL STRAIN - IMPLICATIONS FOR JOB REDESIGN. *Administrative Science Quarterly*, 24(2), 285-308. doi:10.2307/2392498
- Katz, D. (1964). THE MOTIVATIONAL BASIS OF ORGANIZATIONAL-BEHAVIOR. *Behavioral Science*, 9(2), 131-146. doi:10.1002/bs.3830090206
- Katz, H. C., Kochan, T. A., & Gobeille, K. R. (1982). Industrial relations performance, economic performance and quality of working life efforts: An interplant analysis. Unpublished manuscript. Massachusetts Institute of Technology.
- Katz, H. C., Kochan, T. A., & Weber, M. R. (1982). Assessing the effects of industrial relations and quality of working life efforts on organizational effectiveness. Unpublished manuscript. Massachusetts Institute of Technology.
- Katz, R. (1982). THE EFFECTS OF GROUP LONGEVITY ON PROJECT COMMUNICATION AND PERFORMANCE. *Administrative Science Quarterly*, 27(1), 81-104. doi:10.2307/2392547
- Kazanas, H. C. (1978). RELATIONSHIP OF JOB SATISFACTION AND PRODUCTIVITY TO WORK VALUES OF VOCATIONAL-EDUCATION GRADUATES. *Journal of Vocational Behavior*, 12(2), 155-164. doi:10.1016/0001-8791(78)90030-1
- Kazdin, A. E. (1980). *Behavior modification in applied settings*. Homewood, IL: Dorsey.
- Khanna, M., & Anton, W. R. Q. (2002). Corporate environmental management: Regulatory and market-based incentives. *Land Economics*, 78(4), 539-558. doi:10.2307/3146852

- Kim, J. S., & Hamner, W. C. (1976). EFFECT OF PERFORMANCE FEEDBACK AND GOAL SETTING ON PRODUCTIVITY AND SATISFACTION IN AN ORGANIZATIONAL SETTING. *Journal of Applied Psychology*, 61(1), 48-57. doi:10.1037/0021-9010.61.1.48
- Kim, Y., & Ployhart, R. E. (2014). The Effects of Staffing and Training on Firm Productivity and Profit Growth Before, During, and After the Great Recession. *Journal of Applied Psychology*, 99(3), 361-389. doi:10.1037/a0035408
- Klein, K. J., & Harrison, D. A. (2007). On the diversity of diversity: Tidy logic, messier realities. *Academy of Management Perspectives*, 21(4), 26-33.
- Klein, K. J., Knight, A. P., Ziegert, J. C., Lim, B. C., & Saltz, J. L. (2011). When team members' values differ: The moderating role of team leadership Preface. *Organizational Behavior and Human Decision Processes*, 114(1), 25-36. doi:10.1016/j.obhdp.2010.08.004
- Klein, K. J., & Kozlowski, S. W. (2000). Multilevel theory, research, and methods in organizations: Foundations, extensions, and new directions: Jossey-Bass.
- Koch, M. J., & McGrath, R. G. (1996). Improving labor productivity: Human resource management policies do matter. *Strategic Management Journal*, 17(5), 335-354.
- Koh, H. C., & Boo, E. H. Y. (2001). The link between organizational ethics and job satisfaction: A study of managers in Singapore. *Journal of Business Ethics*, 29(4), 309-324. doi:10.1023/a:1010741519818
- Komaki, J. L. (1986). TOWARD EFFECTIVE SUPERVISION - AN OPERANT ANALYSIS AND COMPARISON OF MANAGERS AT WORK. *Journal of Applied Psychology*, 71(2), 270-279. doi:10.1037/0021-9010.71.2.270
- Komaki, J. L., Desselles, M. L., & Schepman, S. B. (1988). Critical linkages in the operant model of effective supervision.
- Kopelman, R. E., Brief, A. P., & Guzzo, R. A. (1990). The Role of Climate and Culture in Productivity. In B. Schneider (Ed.), *Organizational Climate and Culture* (pp. 282-318). San Fransisco: Jossey-Bass.
- Korsgaard, M. A., Meglino, B. M., & Lester, S. W. (1997). Beyond helping: Do other-oriented values have broader implications in organizations? *Journal of Applied Psychology*, 82(1), 160-177. doi:10.1037/0021-9010.82.1.160
- Kunze, F., Boehm, S. A., & Bruch, H. (2011). Age diversity, age discrimination climate and performance consequences-a cross organizational study. *Journal of Organizational Behavior*, 32(2), 264-290. doi:10.1002/job.698
- Larson, J. R., & Callahan, C. (1990). PERFORMANCE MONITORING - HOW IT AFFECTS WORK PRODUCTIVITY. *Journal of Applied Psychology*, 75(5), 530-538. doi:10.1037/0021-9010.75.5.530
- Latham, G. P., & Kinne, S. B. (1974). IMPROVING JOB-PERFORMANCE THROUGH TRAINING IN GOAL SETTING. *Journal of Applied Psychology*, 59(2), 187-191. doi:10.1037/h0036530
- Latham, G. P., & Locke, E. A. (1975). INCREASING PRODUCTIVITY WITH DECREASING TIME LIMITS - FIELD REPLICATION OF PARKINSONS LAW. *Journal of Applied Psychology*, 60(4), 524-526. doi:10.1037/h0076916
- Latham, G. P., & Saari, L. M. (1982). THE IMPORTANCE OF UNION ACCEPTANCE FOR PRODUCTIVITY IMPROVEMENT THROUGH GOAL SETTING. *Personnel Psychology*, 35(4), 781-787. doi:10.1111/j.1744-6570.1982.tb02221.x
- Leach, D. J., Wall, T. D., & Jackson, P. R. (2003). The effect of empowerment on job knowledge: An empirical test involving operators of complex technology. *Journal of Occupational and Organizational Psychology*, 76, 27-52. doi:10.1348/096317903321208871
- Leach, D. J., Wall, T. D., Rogelberg, S. G., & Jackson, P. R. (2005). Team autonomy, performance, and member job strain: Uncovering the teamwork KSA link. *Applied Psychology-an International Review-Psychologie Appliquee-Revue Internationale*, 54(1), 1-24. doi:10.1111/j.1464-0597.2005.00193.x
- Leana, C. R., & Van Buren, H. J. (1999). Organizational social capital and employment practices. *Academy of Management Review*, 24(3), 538-555. doi:10.5465/amr.1999.2202136
- Lepak, D. P., Liao, H., Chung, Y., & Harden, E. E. (2006). A conceptual review of human resource management systems in strategic human resource management research. In *Research in personnel and human resources management* (pp. 217-271): Emerald Group Publishing Limited.
- Locke, E. A. (1968). Toward a theory of task motivation and incentives. *Organizational Behavior and Human Performance*, 3(2), 157-189.
- Locke, E. A. (1976). The nature and causes of job satisfaction. In M. D. Dunnette (Ed.), *Handbook of industrial and organizational psychology* (pp. 1297-1349). Chicago: Rand McNally.
- Locke, E. A., & Bryan, J. F. (1969). The directing function of goals in task performance. *Organizational Behavior and Human Performance*, 4(1), 35-42. doi:http://dx.doi.org/10.1016/0030-5073(69)90030-0
- Locke, E. A., Cartledge, N., & Knerr, C. S. (1970). STUDIES OF RELATIONSHIP BETWEEN SATISFACTION, GOAL-SETTING, AND PERFORMANCE. *Organizational Behavior and Human Performance*, 5(2), 135-158. doi:10.1016/0030-5073(70)90011-5
- Locke, E. A., Feren, D. B., McCaleb, V. M., Shaw, K. N., & Denny, A. T. (1980). The relative effectiveness of four methods of motivating employee performance. In K. Duncan, M. Gruneberg, & D. Wallis (Eds.), *Changes in working life* (pp. 363-388). New York: Wiley.
- Locke, E. A., & Latham, G. P. (1990). *A theory of goal setting and task performance*. Englewoods Cliffs, NJ: Prentice Hall.
- Locke, E. A., Saari, L. M., Shaw, K. N., & Latham, G. P. (1981). GOAL SETTING AND TASK-PERFORMANCE - 1969-1980. *Psychological Bulletin*, 90(1), 125-152. doi:10.1037/0033-2909.90.1.125
- Luthans, F. (1979). Leadership: A proposal for a social learning theory base and observational and functional analysis techniques to measure leader behavior. In J. G. Hunt & L. L. Larson (Eds.), *Crosscurrents in leadership* (pp. 201-208). Carbondale: Southern Illinois University Press.
- Lyman, E. L. (1955). Occupational Differences in the Value Attached to Work. *American Journal of Sociology*, 61(2), 138-144.



- Manning, F. J., & Fullerton, T. D. (1988). HEALTH AND WELL-BEING IN HIGHLY COHESIVE UNITS OF THE UNITED-STATES-ARMY. *Journal of Applied Social Psychology*, 18(6), 503-519. doi:10.1111/j.1559-1816.1988.tb00032.x
- Manske, M. E., & Davis, G. A. (1968). EFFECTS OF SIMPLE INSTRUCTIONAL BIASES UPON PERFORMANCE IN UNUSUAL USES TEST. *Journal of General Psychology*, 79(1), 25-&.
- March, J. G. (1991). EXPLORATION AND EXPLOITATION IN ORGANIZATIONAL LEARNING. *Organization Science*, 2(1), 71-87. doi:10.1287/orsc.2.1.71
- Mento, A. J., Steel, R. P., & Karren, R. J. (1987). A META-ANALYTIC STUDY OF THE EFFECTS OF GOAL-SETTING ON TASK-PERFORMANCE - 1966-1984. *Organizational Behavior and Human Decision Processes*, 39(1), 52-83. doi:10.1016/0749-5978(87)90045-8
- Moch, M. K., & Fitzgibbons, D. E. (1982). Automation, employee centrality in the production process, the extent to which absences can be anticipated, and the relationship between absenteeism and operating efficiency: An empirical assessment. Unpublished manuscript. University of Texas at Dallas.
- Mohrman, S. A., & Novelli, L. (1985). BEYOND TESTIMONIALS - LEARNING FROM A QUALITY CIRCLES PROGRAM. *Journal of Occupational Behaviour*, 6(2), 93-110. doi:10.1002/job.4030060202
- Mossholder, K. W. (1980). EFFECTS OF EXTERNALLY MEDIATED GOAL SETTING ON INTRINSIC MOTIVATION - A LABORATORY EXPERIMENT. *Journal of Applied Psychology*, 65(2), 202-210. doi:10.1037/0021-9010.65.2.202
- Myers, M. S. (1964). Who are your motivated workers? *Harvard Business Review*, 17, 73-88.
- Nadler, D. A. (1979). The effects of feedback on task group behavior: A review of the experimental research. *Organizational Behavior and Human Performance*, 23(3), 309-338.
- Naff, K. C., & Crum, J. (1999). Working for America. *Review of Public Personnel Administration*, 19(4), 5-16. doi:doi:10.1177/0734371X9901900402
- Naylor, J. C., Pritchard, R. D., & Ilgen, D. R. (1980). A theory of behavior in organizations. San Diego, CA: Academic Press.
- Noe, R. A. (2008). Employee training and development. Boston, MA: Irwin-McGraw.
- Odiorne, G. S. (1976). MBO in State Government. *Public Administration Review*, 36(1), 28-33. doi:10.2307/974738
- Odiorne, G. S. (1986). MBO II: A system of managerial leadership for the 80s. Belmont, CA: Pitman Publishers.
- Oreilly, C., & Chatman, J. (1986). ORGANIZATIONAL COMMITMENT AND PSYCHOLOGICAL ATTACHMENT - THE EFFECTS OF COMPLIANCE, IDENTIFICATION, AND INTERNALIZATION ON PRO-SOCIAL BEHAVIOR. *Journal of Applied Psychology*, 71(3), 492-499. doi:10.1037/0021-9010.71.3.492
- Organ, D. (1988). Organizational citizenship behavior: The good soldier syndrome. Lexington, MA: Lexington Books.
- Orsburn, J. D., & Moran, L. (2000). The new self-directed work teams: Mastering the challenge (2nd ed.). New York, NY: McGraw-Hill.
- Parker, S. K., & Wall, T. D. (1998). Job and work design. London: Sage.
- Parker, S. K., Williams, H. M., & Turner, N. (2006). Modeling the antecedents of proactive behavior at work. *Journal of Applied Psychology*, 91(3), 636-652. doi:10.1037/0021-9010.91.3.636
- Parry, E., & Urwin, P. (2011). Generational Differences in Work Values: A Review of Theory and Evidence. *International Journal of Management Reviews*, 13(1), 79-96. doi:10.1111/j.1468-2370.2010.00285.x
- Patterson, M., Warr, P., & West, M. (2004). Organizational climate and company productivity: The role of employee affect and employee level. *Journal of Occupational and Organizational Psychology*, 77, 193-216. doi:10.1348/096317904774202144
- Patterson, M. G., West, M. A., & Wall, T. D. (2004). Integrated manufacturing, empowerment, and company performance. *Journal of Organizational Behavior*, 25(5), 641-665. doi:10.1002/job.261
- Payne, R. B., & Hauty, G. T. (1955). EFFECT OF PSYCHOLOGICAL FEEDBACK UPON WORK DECREMENT. *Journal of Experimental Psychology*, 50(6), 343-351. doi:10.1037/h0045068
- Pelled, L. H. (1996). Demographic diversity, conflict, and work group outcomes: An intervening process theory. *Organization Science*, 7(6), 615-631. doi:10.1287/orsc.7.6.615
- Pfeffer, J. (1980). A PARTIAL TEST OF THE SOCIAL INFORMATION-PROCESSING MODEL OF JOB-ATTITUDES. *Human Relations*, 33(7), 457-476. doi:10.1177/001872678003300702
- Pfeffer, J. (1998). The human equation: Building profits by putting people first. Boston, MA: Harvard Business School Press.
- Pfeffer, J., & Cohen, Y. (1984). DETERMINANTS OF INTERNAL LABOR-MARKETS IN ORGANIZATIONS. *Administrative Science Quarterly*, 29(4), 550-572. doi:10.2307/2392939
- Ployhart, R. E., & Schneider, B. (2002). A multi-level perspective on personnel selection research and practice: Implications for selection system design, assessment, and construct validation. In *The many faces of multi-level issues* (pp. 95-140): Emerald Group Publishing Limited.
- Ployhart, R. E., Weekley, J. A., & Ramsey, J. (2009). THE CONSEQUENCES OF HUMAN RESOURCE STOCKS AND FLOWS: A LONGITUDINAL EXAMINATION OF UNIT SERVICE ORIENTATION AND UNIT EFFECTIVENESS. *Academy of Management Journal*, 52(5), 996-1015.
- Podsakoff, N. P., Whiting, S. W., Podsakoff, P. M., & Blume, B. D. (2009). Individual- and Organizational-Level Consequences of Organizational Citizenship Behaviors: A Meta-Analysis. *Journal of Applied Psychology*, 94(1), 122-141. doi:10.1037/a0013079
- Podsakoff, P. M., MacKenzie, S. B., & Ahearne, M. (1997). Moderating effects of goal acceptance on the relationship between group cohesiveness and productivity. *Journal of Applied Psychology*, 82(6), 974-983. doi:10.1037/0021-9010.82.6.374
- Porter, L. W., & Lawler, E. E. (1968). Managerial attitudes and performance. Homewood, IL: Irwin-Dorsey.
- Porter, M. E. (1985). Competitive advantage. New York, NY: The Free Press.

- Power, J., & Waddell, D. (2004). The link between self-managed work teams and learning organisations using performance indicators. *The learning organization*, 11(3), 244-259.
- Probst, T. M. (2003). Development and validation of the job Security Index and the job Security Satisfaction scale: A classical test theory and IRT approach. *Journal of Occupational and Organizational Psychology*, 76, 451-467. doi:10.1348/096317903322591587
- Probst, T. M., & Brubaker, T. L. (2001). The effects of job insecurity on employee safety outcomes: cross-sectional and longitudinal explorations. *Journal of occupational health psychology*, 6(2), 139-159. doi:10.1037//1076-8998.6.2.139
- Probst, T. M., Stewart, S. M., Gruys, M. L., & Tierney, B. W. (2007). Productivity, counterproductivity and creativity: The ups and downs of job insecurity. *Journal of Occupational and Organizational Psychology*, 80, 479-497. doi:10.1348/096317906x159103
- Ramus, C. A., & Steger, U. (2000). The Roles of Supervisory Support Behaviors and Environmental Policy in Employee "Ecoinitiatives" at Leading-Edge European Companies. *The Academy of Management Journal*, 43(4), 605-626. doi:10.2307/1556357
- Reitz, H. J. (1987). *Behavior in organizations* (3rd ed.). Homewood, IL: Irwin.
- Ren, Y., & Argote, L. (2011). Transactive Memory Systems 1985-2010: An Integrative Framework of Key Dimensions, Antecedents, and Consequences. *Academy of Management Annals*, 5, 189-229. doi:10.1080/19416520.2011.590300
- Rioux, S. M., & Penner, L. A. (2001). The causes of organizational citizenship behavior: A motivational analysis. *Journal of Applied Psychology*, 86(6), 1306-1314. doi:10.1037/0021-9010.86.6.1306
- Rodgers, R., & Hunter, J. E. (1991). IMPACT OF MANAGEMENT BY OBJECTIVES ON ORGANIZATIONAL PRODUCTIVITY. *Journal of Applied Psychology*, 76(2), 322-336. doi:10.1037/0021-9010.76.2.322
- Rokeach, M. (1965). In pursuit of the creative process. In G. A. Steiner (Ed.), *The creative organization* (pp. 66-88). Chicago: University of Chicago Press.
- Roskies, E., & Louisguerin, C. (1990). JOB INSECURITY IN MANAGERS - ANTECEDENTS AND CONSEQUENCES. *Journal of Organizational Behavior*, 11(5), 345-359. doi:10.1002/job.4030110503
- Rothe, H. F. (1970). OUTPUT RATES AMONG WELDERS - PRODUCTIVITY AND CONSISTENCY FOLLOWING REMOVAL OF A FINANCIAL INCENTIVE SYSTEM. *Journal of Applied Psychology*, 54(6), 549-&. doi:10.1037/h0030139
- Rothkopf, E. Z., & Billington, M. J. (1979). GOAL-GUIDED LEARNING FROM TEXT - INFERRING A DESCRIPTIVE PROCESSING MODEL FROM INSPECTION TIMES AND EYE-MOVEMENTS. *Journal of Educational Psychology*, 71(3), 310-327. doi:10.1037/0022-0663.71.3.310
- Salancik, G. R., & Pfeffer, J. (1977). EXAMINATION OF NEED-SATISFACTION MODELS OF JOB ATTITUDES. *Administrative Science Quarterly*, 22(3), 427-456. doi:10.2307/2392182
- Salancik, G. R., & Pfeffer, J. (1978). SOCIAL INFORMATION-PROCESSING APPROACH TO JOB ATTITUDES AND TASK DESIGN. *Administrative Science Quarterly*, 23(2), 224-253. doi:10.2307/2392563
- Sammalisto, K., & Brorson, T. (2008). Training and communication in the implementation of environmental management systems (ISO 14001): a case study at the University of Gävle, Sweden. *Journal of Cleaner Production*, 16(3), 299-309. doi:http://dx.doi.org/10.1016/j.jclepro.2006.07.029
- Sanders, G. S., & Baron, R. S. (1975). MOTIVATING EFFECTS OF DISTRACTION ON TASK-PERFORMANCE. *Journal of Personality and Social Psychology*, 32(6), 956-963. doi:10.1037//0022-3514.32.6.956
- Schein, V. E., Maurer, E. H., & Novak, J. F. (1977). IMPACT OF FLEXIBLE WORKING HOURS ON PRODUCTIVITY. *Journal of Applied Psychology*, 62(4), 463-465. doi:10.1037//0021-9010.62.4.463
- Schermerhorn, J. R., Hunt, J. G., & Osborn, R. N. (1988). *Managing organizational behavior*. New York: Wiley.
- Schleh, E. C. (1959). Management by objectives: Some principles for making it work. *The Management Reveiw*, 48, 26-33.
- Schmidt, F. L., Hunter, J. E., McKenzie, R. C., & Muldrow, T. W. (1979). IMPACT OF VALID SELECTION PROCEDURES ON WORK-FORCE PRODUCTIVITY. *Journal of Applied Psychology*, 64(6), 609-626. doi:10.1037//0021-9010.64.6.609
- Schmidt, F. L., Hunter, J. E., & Outerbridge, A. N. (1986). IMPACT OF JOB EXPERIENCE AND ABILITY ON JOB KNOWLEDGE, WORK SAMPLE PERFORMANCE, AND SUPERVISORY RATINGS OF JOB-PERFORMANCE. *Journal of Applied Psychology*, 71(3), 432-439. doi:10.1037/0021-9010.71.3.432
- Schmidt, F. L., Hunter, J. E., Outerbridge, A. N., & Trattner, M. H. (1986). THE ECONOMIC-IMPACT OF JOB SELECTION METHODS ON SIZE, PRODUCTIVITY, AND PAYROLL COSTS OF THE FEDERAL WORK FORCE - AN EMPIRICALLY BASED DEMONSTRATION. *Personnel Psychology*, 39(1), 1-29. doi:10.1111/j.1744-6570.1986.tb00572.x
- Schmitt, N., & Chan, D. (1998). *Personnel selection: A theoretical approach*: Sage.
- Scott, W. E., & Podsakoff, P. M. (1985). *Behavioral principles in the practice of management*. New York: Wiley.
- Senge, P. M. (1990). *The fifth discipline: The ae and practice of the learning oranization*. London: Century Business.
- Shalley, C. E. (1989). The effects of goal setting procedures and personal discretion on individuals' creativity. Unpublished doctoral dissertation. University of Illinois.
- Shalley, C. E. (1991). EFFECTS OF PRODUCTIVITY GOALS, CREATIVITY GOALS, AND PERSONAL DISCRETION ON INDIVIDUAL CREATIVITY. *Journal of Applied Psychology*, 76(2), 179-185. doi:10.1037/0021-9010.76.2.179
- Shalley, C. E., & Oldham, G. R. (1985). Effects of goal difficulty and expected external evaluation on intrinsic motivation: A laboratory study. *Academy of Management Journal*, 28(3), 628-640.
- Shalley, C. E., Oldham, G. R., & Porac, J. F. (1987). EFFECTS OF GOAL DIFFICULTY, GOAL-SETTING METHOD, AND EXPECTED EXTERNAL EVALUATION ON INTRINSIC MOTIVATION. *Academy of Management Journal*, 30(3), 553-563. doi:10.2307/256014
- Shaw, M. B. (1981). *Group dynamics: The psychology of group behavior* (3rd ed.). New York: McGraw-Hill.
- Shell, R. L., & Allgeier, R. (1992). A multi-level incentive model for service organizations. *Applied Ergonomics*, 23(1), 43-48.

- Simon, H. A. (1985). What we know about the creative process. In R. I. Kuhn (Ed.), *Frontiers in creative and innovative management* (pp. 3-20). Cambridge, MA: Ballinger.
- Simonton, B. K. (1999). Creativity from a historiometric perspective. In R. J. Sternberg (Ed.), *Handbook of creativity*. Cambridge, England: Cambridge University Press.
- Smeltz, W., & Cross, B. (1984). Toward a profile of the creative R & D. *IEEE Transactions on Engineering Management*, EM-31, 22-25.
- Smith, E. E., & Kight, S. S. (1959). Effects of feedback on insight and problem solving efficiency in training groups. *Journal of Applied Psychology*, 43(3), 209.
- Smith, M. J., Carayon, P., Sanders, K. J., Lim, S. Y., & Legrande, D. (1992). EMPLOYEE STRESS AND HEALTH COMPLAINTS IN JOBS WITH AND WITHOUT ELECTRONIC PERFORMANCE MONITORING. *Applied Ergonomics*, 23(1), 17-27. doi:10.1016/0003-6870(92)90006-h
- Sparrow, P. R. (2001). Developing Diagnostics for High Performance Organization Cultures. In C. L. Cooper, S. Cartwright, & P. C. Earley (Eds.), *The International Handbook of Organizational Culture and Climate* (pp. 85-106). Chichester: Wiley.
- Speller, K. G., & Schumacher, G. M. (1975). AGE AND SET IN CREATIVE TEST PERFORMANCE. *Psychological Reports*, 36(2), 447-450.
- Staw, B. M., & Boettger, R. D. (1990). TASK REVISION - A NEGLECTED FORM OF WORK PERFORMANCE. *Academy of Management Journal*, 33(3), 534-559. doi:10.2307/256580
- Steiner, G. A. (1965). Introduction. In G. A. Steiner (Ed.), *The creative organization* (pp. 1-24). Chicago: University of Chicago Press.
- Sun, L.-Y., Aryee, S., & Law, K. S. (2007). High-performance human resource practices, citizenship behavior, and organizational performance: A relational perspective. *Academy of Management Journal*, 50(3), 558-577.
- Tajfel, H., & Turner, J. C. (1979). An integrative theory of intergroup conflict. *The social psychology of intergroup relations*, 33(47), 74.
- Tannenbaum, R., & Massarik, F. (1950). Participation by subordinates in the managerial decision-making process. *Canadian Journal of Economics and Political Science/Revue canadienne de economiques et science politique*, 16(03), 408-418.
- Tharenou, P., Saks, A. M., & Moore, C. (2007). A review and critique of research on training and organizational-level outcomes. *Human Resource Management Review*, 17(3), 251-273.
- Tsui, A. S., Pearce, J. L., Porter, L. W., & Tripoli, A. M. (1997). Alternative approaches to the employee-organization relationship: Does investment in employees pay off? *Academy of Management Journal*, 40(5), 1089-1121. doi:10.2307/256928
- Tubbs, M. E. (1986). GOAL-SETTING - A META-ANALYTIC EXAMINATION OF THE EMPIRICAL-EVIDENCE. *Journal of Applied Psychology*, 71(3), 474-483. doi:10.1037//0021-9010.71.3.474
- Tversky, A., & Kahneman, D. (1973). AVAILABILITY - HEURISTIC FOR JUDGING FREQUENCY AND PROBABILITY. *Cognitive Psychology*, 5(2), 207-232. doi:10.1016/0010-0285(73)90033-9
- Umstot, D. D., Bell, C. H., & Mitchell, T. R. (1976). EFFECTS OF JOB ENRICHMENT AND TASK GOALS ON SATISFACTION AND PRODUCTIVITY - IMPLICATIONS FOR JOB DESIGN. *Journal of Applied Psychology*, 61(4), 379-394. doi:10.1037//0021-9010.61.4.379
- Van Dyne, L., Jehn, K. A., & Cummings, A. (2002). Differential effects of strain on two forms of work performance: individual employee sales and creativity. *Journal of Organizational Behavior*, 23(1), 57-74. doi:10.1002/job.127
- Van Iddekinge, C. H., Ferris, G. R., Perrewe, P. L., Perryman, A. A., Blass, F. R., & Heetderks, T. D. (2009). Effects of Selection and Training on Unit-Level Performance Over Time: A Latent Growth Modeling Approach. *Journal of Applied Psychology*, 94(4), 829-843. doi:10.1037/a0014453
- Vanzelst, R. H. (1952). VALIDATION OF A SOCIOMETRIC REGROUPING PROCEDURE. *Journal of Abnormal and Social Psychology*, 47(2), 299-301. doi:10.1037/h0062668
- Viswesvaran, C., Deshpande, S. P., & Joseph, J. (1998). Job satisfaction as a function of top management support for ethical behavior: A study of Indian managers. *Journal of Business Ethics*, 17(4), 365-371. doi:10.1023/a:1017956516324
- Vroom, V. H. (1964). *Work and motivation*. New York: Wiley.
- Wagner, D. (2007). Managing an age-diverse work force. *Mit Sloan Management Review*, 48(4), 9-9.
- Weinstein, A. G., & Holzbach, R. L. (1973). IMPACT OF INDIVIDUAL DIFFERENCES, REWARD DISTRIBUTION, AND TASK STRUCTURE ON PRODUCTIVITY IN A SIMULATED WORK ENVIRONMENT. *Journal of Applied Psychology*, 58(3), 296-301. doi:10.1037/h0036197
- Weitz, J., Antoinetti, J., & Wallace, S. R. (1954). The Effect of Home Office Contact on Sales Performance. *Personnel Psychology*, 7(3), 381-384. doi:10.1111/j.1744-6570.1954.tb01606.x
- Wernimont, P. F. (1966). INTRINSIC AND EXTRINSIC FACTORS IN JOB SATISFACTION. *Journal of Applied Psychology*, 50(1), 41-+. doi:10.1037/h0022938
- Williams, K. Y., & O'Reilly, C. A. (1998). Demography and diversity in organizations: A review of 40 years of research. *Research in Organizational Behavior*, Vol 20, 1998, 20, 77-140.
- Wise, G. (1992). Inventor and corporations in the maturing electrical industry. In R. J. Weber & D. W. Perkins (Eds.), *Inventive minds: Creativity in technology*. Oxford, England: Oxford University Press.
- Wright, P. M., George, J. M., Farnsworth, S. R., & McMahan, G. C. (1993). PRODUCTIVITY AND EXTRA-ROLE BEHAVIOR - THE EFFECTS OF GOALS AND INCENTIVES ON SPONTANEOUS HELPING. *Journal of Applied Psychology*, 78(3), 374-381.

Zacharatos, A., Barling, J., & Iverson, R. D. (2005). High-performance work systems and occupational safety. *Journal of Applied Psychology*, 90(1), 77-93. doi:10.1037/0021-9010.90.1.77

Zwick, T. (2004). Employee participation and productivity. *Labour Economics*, 11(6), 715-740. doi:10.1016/j.labeco.2004.02.001

## Appendix A

In Table 8 individual CLD items are listed in alphabetical order. All the items that appear in one of the 45 CLD's resulting from the literature analysis (115 items) are in first column of the table. Columns two and three show the names that each item has after the item reductions in synthesis steps 1 and 2. The eight "effect items" are at the bottom of the table.

**Table 8.** List of all items at every step of the research.

| Item name in literature analysis              | Item name after synthesis step 1              | Item name after synthesis step 2 |
|-----------------------------------------------|-----------------------------------------------|----------------------------------|
| Absenteeism                                   | Absenteeism                                   | Employee productivity            |
| Actual or threats of downsizing               | Actual or threats of downsizing               | Job insecurity                   |
| Age group size                                | -                                             | -                                |
| Age polarization                              | -                                             | -                                |
| Age related value differences                 | -                                             | -                                |
| Age specific knowledge differences            | -                                             | -                                |
| Age variety                                   | -                                             | -                                |
| Applicant pool size                           | Applicant pool size                           | -                                |
| Attitudes                                     | Attitudes                                     | Employee productivity            |
| Autonomy                                      | Autonomy                                      | Autonomy                         |
| Cognitive activities (for creativity)         | Effort used on creativity                     | Effort used on non-goal tasks    |
| Cohesion                                      | Cohesion                                      | Teamwork                         |
| Commitment                                    | Commitment                                    | -                                |
| Communication                                 | Communication                                 | Teamwork                         |
| Company climate                               | Company climate                               | Company climate                  |
| Company performance                           | Company performance                           | Company performance              |
| Company productivity                          | Company productivity                          | Company productivity             |
| Contingency of performance consequences       | Contingency of performance consequences       | Performance consequences         |
| Cooperation                                   | Cooperation                                   | Teamwork                         |
| Costs                                         | Costs                                         | Costs                            |
| Counter-productive behavior                   | Counter-productive behavior                   | Employee productivity            |
| Creative environment                          | Creative environment                          | Company climate                  |
| Creativity                                    | Creativity                                    | Creativity                       |
| Creativity goal setting                       | Creativity goal setting                       | Creativity goal setting          |
| Effort used on creativity                     | Effort used on creativity                     | Effort used on non-goal tasks    |
| Effort used on non-goal tasks                 | Effort used on non-goal tasks                 | Effort used on non-goal tasks    |
| Effort used to reach goal                     | Effort used to reach goal                     | Effort used to reach goal        |
| Employee abilities                            | Employee abilities                            | -                                |
| Employee and job match                        | -                                             | -                                |
| Employee initiative use                       | Employee initiative use                       | Employee proactivity             |
| Employee need                                 | Employee need                                 | -                                |
| Employee proactivity                          | Employee proactivity                          | Employee proactivity             |
| Employee productivity                         | Employee productivity                         | Employee productivity            |
| Employee turnover                             | Employee turnover                             | -                                |
| Employees                                     | Employees                                     | -                                |
| Entrepreneurial activities                    | Entrepreneurial activities                    | Entrepreneurial activities       |
| Equality of reward system                     | -                                             | -                                |
| Extra-role behavior                           | Extra-role behavior                           | Extra-role behavior              |
| Feedback                                      | Feedback                                      | Feedback                         |
| Feelings of social isolation                  | Feelings of social isolation                  | Teamwork                         |
| Financial incentive                           | Financial incentive                           | Performance consequences         |
| Firm greenness                                | -                                             | -                                |
| Firm size                                     | -                                             | -                                |
| Firm-specific knowledge                       | Firm-specific knowledge                       | Firm-specific knowledge          |
| Flexitime                                     | -                                             | -                                |
| Focus on specific tasks (routine or rewarded) | Focus on specific tasks (routine or rewarded) | Effort used to reach goal        |

| <b>Item name in literature analysis</b>     | <b>Item name after synthesis step 1</b>    | <b>Item name after synthesis step 2</b> |
|---------------------------------------------|--------------------------------------------|-----------------------------------------|
| Generic human capital resources             | Generic human capital resources            | Generic human capital resources         |
| Goal commitment                             | Goal commitment                            | Goal commitment                         |
| Goal difficulty                             | Goal difficulty                            | Goal difficulty                         |
| Goal setting                                | Goal setting                               | Goal setting                            |
| Goal specificity                            | Goal specificity                           | Goal specificity                        |
| Group cohesiveness                          | Teamwork                                   | Teamwork                                |
| Group productivity                          | Employee productivity                      | Employee productivity                   |
| Growth need strength                        | Growth need strength                       | -                                       |
| Growth opportunities                        | Growth opportunities                       | Training                                |
| In-group bias                               | -                                          | -                                       |
| Information                                 | -                                          | -                                       |
| Information about employee performance      | Information about employee performance     | -                                       |
| Intrinsic motivation                        | Intrinsic motivation                       | Intrinsic motivation                    |
| Intrinsic orientation of work values        | -                                          | -                                       |
| Job enrichment                              | Job enrichment                             | Job enrichment                          |
| Job insecurity                              | Job insecurity                             | Job insecurity                          |
| Job satisfaction                            | Job satisfaction                           | Job satisfaction                        |
| Knowledge sharing                           | Knowledge sharing                          | Knowledge sharing                       |
| Leadership                                  | Leadership                                 | Leadership                              |
| Level of interdependence of group members   | -                                          | -                                       |
| Long-term economic growth                   | Long-term economic growth                  | Company performance                     |
| Management by Objectives                    | -                                          | -                                       |
| Management commitment                       | -                                          | -                                       |
| Need for supervision                        | Need for supervision                       | Autonomy                                |
| Non-goal task performance                   | Non-goal task performance                  | Effort used on non-goal tasks           |
| Organizational routines                     | Firm-specific knowledge                    | Firm-specific knowledge                 |
| Participation                               | -                                          | -                                       |
| Payroll costs                               | Costs                                      | Costs                                   |
| Perceived clarity of expectations and goals | Goal specificity                           | Goal specificity                        |
| Perceived concern for employee welfare      | Perceived concern for employee welfare     | Company climate                         |
| Perceived corporate social responsibility   | Perceived corporate social responsibility  | Company climate                         |
| Perceived effort                            | Perceived effort                           | Company climate                         |
| Perceived focus on quality                  | Perceived focus on quality                 | Perceived focus on quality              |
| Perceived innovation and flexibility        | Perceived innovation and flexibility       | Company climate                         |
| Perceived job challenge                     | Goal difficulty                            | Goal difficulty                         |
| Perceived likelihood of performance reward  | Perceived likelihood of performance reward | Performance consequences                |
| Perceived meaningfulness of work            | Perceived meaningfulness of work           | Company climate                         |
| Perceived performance feedback              | Perceived performance feedback             | Company climate                         |
| Perceived quality                           | Perceived quality                          | Company climate                         |
| Perceived relative importance of task       | Perceived relative importance of task      | -                                       |
| Perceived skill development                 | Perceived skill development                | Company climate                         |
| Perceived supervisory support               | Perceived supervisory support              | Company climate                         |
| Performance monitoring                      | Performance monitoring                     | Performance monitoring                  |
| Performance monitoring group size           | -                                          | -                                       |
| Persistence                                 | Persistence                                | Employee productivity                   |
| Prosocial motivation                        | -                                          | -                                       |
| Quality                                     | Quality                                    | Employee productivity                   |
| Quality of decision making                  | Quality of decision making                 | Quality of decision making              |
| Quality of work methods and processes       | -                                          | -                                       |
| Replacements                                | Replacements                               | -                                       |
| Responsibility                              | Responsibility                             | Autonomy                                |
| Revenues                                    | Revenues                                   | Revenues                                |
| Selection ratio                             | Selection ratio                            | -                                       |
| Selective staffing                          | Selective staffing                         | -                                       |
| Shared knowledge and mental models          | Firm-specific knowledge                    | Firm-specific knowledge                 |
| Skill variety                               | Skill variety                              | Perceived meaningfulness of work        |
| Social support                              | Social support                             | Teamwork                                |
| Socio-technical interventions               | -                                          | -                                       |
| Strategy development                        | Strategy development                       | Employee productivity                   |

| Item name in literature analysis                 | Item name after synthesis step 1     | Item name after synthesis step 2     |
|--------------------------------------------------|--------------------------------------|--------------------------------------|
| Stress                                           | Stress                               | Stress                               |
| Subcultural predisposition                       | Subcultural predisposition           | Company climate                      |
| Task identity                                    | Task identity                        | Perceived meaningfulness of work     |
| Task significance                                | Task significance                    | Perceived meaningfulness of work     |
| Teamwork                                         | Teamwork                             | Teamwork                             |
| Training                                         | Training                             | Training                             |
| Transactive memory                               | Firm-specific knowledge              | Firm-specific knowledge              |
| Work demands                                     | Work demands                         | Performance monitoring (effect)      |
| Work experience                                  | Work experience                      | Firm-specific knowledge              |
| Work rescheduling                                | -                                    | -                                    |
| The effect of age related value differences      | -                                    | -                                    |
| The effect of age specific knowledge differences | -                                    | -                                    |
| The effect of goal difficulty                    | The effect of goal difficulty        | The effect of goal difficulty        |
| The effect of goal setting                       | The effect of goal setting           | The effect of goal setting           |
| The effect of growth opportunities               | -                                    | -                                    |
| The effect of job enrichment                     | The effect of job enrichment         | The effect of job enrichment         |
| The effect of performance monitoring             | The effect of performance monitoring | The effect of performance monitoring |
| The effect of prosocial motivation               | -                                    | -                                    |
